# Supplementary material for: Syntheses and structures of Zr4tetrahedral clusters containing direct Zr–Zr bonds: the missing cluster in the series Zrn(n = 2–6)
Source: Royal Society of Chemistry journal article supplement (doi:10.1039/c2dt31428b), 2012-10-04
Supplement: c2dt31428b.pdf [file c2dt31428b.pdf]

## Supporting Information

### Syntheses and Structures of Zr<sub>4</sub> Tetrahedral Clusters Containing Direct Zr-Zr

#### Bonds: The Missing Cluster in the Series Zr<sub>n</sub> (n = 2-6)

Hsueh-Hui Yang,<sup>†</sup> Chung-Hsien Chien,<sup>‡</sup> Chien-Chan Yang,<sup>‡</sup> Fu-Chen Liu,<sup>\*,‡</sup> Agnes H. H.

Chang,<sup>\*,‡</sup> Gene-Hsian Lee,<sup>||</sup> Shie-Ming Peng<sup>||</sup>

<sup>†</sup>Department of Medical Research, Buddhist Tzu Chi General Hospital and General Education Center, Tzu Chi College of Technology, Hualien, 970, Taiwan, ROC

<sup>‡</sup>Department of Chemistry, National Dong Hwa University, Hualien 974, Taiwan, ROC

<sup>||</sup>Department of Chemistry, National Taiwan University, Taipei 106, Taiwan, ROC

|                                                                                                                                                                                                                                      |     |
|--------------------------------------------------------------------------------------------------------------------------------------------------------------------------------------------------------------------------------------|-----|
| Table S1. Atomic coordinates ( $\times 10^4$ ) and equivalent isotropic displacement parameters ( $\text{\AA}^2 \times 10^3$ ) for $[(\mu_2\text{-H})_8(\mu_2\text{-Cl})_2(\text{Cp}^*\text{Zr})_4] \cdot 2(\text{C}_7\text{H}_8)$ . | 2pg |
| Table S2. Bond lengths [ $\text{\AA}$ ] and angles [ $^\circ$ ] for $[(\mu_2\text{-H})_8(\mu_2\text{-Cl})_2(\text{Cp}^*\text{Zr})_4] \cdot 2(\text{C}_7\text{H}_8)$ .                                                                | 9pg |
| Table S3. Anisotropic displacement parameters ( $\text{\AA}^2 \times 10^3$ ) for $[(\mu_2\text{-H})_8(\mu_2\text{-Cl})_2(\text{Cp}^*\text{Zr})_4] \cdot 2(\text{C}_7\text{H}_8)$ .                                                   | 2pg |
| Table S4. Hydrogen coordinates ( $\times 10^4$ ) and isotropic displacement parameters ( $\text{\AA}^2 \times 10^3$ ) for $[(\mu_2\text{-H})_8(\mu_2\text{-Cl})_2(\text{Cp}^*\text{Zr})_4] \cdot 2(\text{C}_7\text{H}_8)$ .          | 2pg |
| Table S5. Atomic coordinates ( $\times 10^4$ ) and equivalent isotropic displacement parameters ( $\text{\AA}^2 \times 10^3$ ) for $[(\mu_2\text{-H})_6(\text{Cp}^*\text{Zr})_4]$ .                                                  | 2pg |
| Table S6. Bond lengths [ $\text{\AA}$ ] and angles [ $^\circ$ ] for $[(\mu_2\text{-H})_6(\text{Cp}^*\text{Zr})_4]$ .                                                                                                                 | 7pg |
| Table S7. Anisotropic displacement parameters ( $\text{\AA}^2 \times 10^3$ ) for $[(\mu_2\text{-H})_6(\text{Cp}^*\text{Zr})_4]$ .                                                                                                    | 2pg |
| Table S8. Hydrogen coordinates ( $\times 10^4$ ) and isotropic displacement parameters ( $\text{\AA}^2 \times 10^3$ )                                                                                                                |     |

for  $[(\mu_2\text{-H})_6(\text{Cp}^*\text{Zr})_4]$ .

2pg

Table S9. Wiberg bond indices (bond order) obtained by B3LYP with basis LanL2DZ for Zr, and cc-pVDZ for Cl, C, and H.

Figure S1. Powder X-ray diffraction pattern of  $[(\mu_2\text{-H})_6(\text{Cp}^*\text{Zr})_4]$  (a) calculated from a single crystal diffraction data (b) from powders

1pg

Table S1. Atomic coordinates ( $\times 10^4$ ) and equivalent isotropic displacement parameters ( $\text{\AA}^2 \times 10^3$ ) for  $[(\mu_2\text{-H})_8(\mu_2\text{-Cl})_2(\text{Cp}^*\text{Zr})_4] \cdot 2(\text{C}_7\text{H}_8)$ .

|       | x        | y        | z       | U(eq)  |
|-------|----------|----------|---------|--------|
| Zr(1) | 1519(1)  | 13907(1) | 7717(1) | 32(1)  |
| Zr(2) | 2345(1)  | 15452(1) | 8609(1) | 30(1)  |
| Zr(3) | 2705(1)  | 13441(1) | 8630(1) | 32(1)  |
| Zr(4) | 3474(1)  | 14927(1) | 7691(1) | 31(1)  |
| Cl(1) | 648(1)   | 15237(1) | 8163(1) | 40(1)  |
| Cl(2) | 4373(1)  | 13627(1) | 8152(1) | 39(1)  |
| C(1)  | 1000(3)  | 12571(3) | 7235(2) | 39(1)  |
| C(2)  | 1159(3)  | 13261(3) | 6894(2) | 42(1)  |
| C(3)  | 427(4)   | 13925(3) | 6975(2) | 49(1)  |
| C(4)  | -182(3)  | 13648(4) | 7354(2) | 46(1)  |
| C(5)  | 157(3)   | 12807(3) | 7517(2) | 41(1)  |
| C(6)  | 1535(4)  | 11695(4) | 7242(2) | 60(2)  |
| C(7)  | 1885(4)  | 13211(4) | 6482(2) | 70(2)  |
| C(8)  | 257(5)   | 14735(4) | 6669(3) | 84(2)  |
| C(9)  | -1104(4) | 14101(4) | 7539(3) | 76(2)  |
| C(10) | -343(4)  | 12201(4) | 7872(2) | 69(2)  |
| C(11) | 2339(4)  | 17101(3) | 8807(2) | 42(1)  |
| C(12) | 1443(4)  | 16750(3) | 9000(2) | 45(1)  |
| C(13) | 1691(3)  | 16155(3) | 9380(2) | 39(1)  |
| C(14) | 2737(3)  | 16143(3) | 9419(2) | 37(1)  |
| C(15) | 3126(4)  | 16724(3) | 9074(2) | 40(1)  |
| C(16) | 2405(5)  | 17830(4) | 8436(2) | 75(2)  |
| C(17) | 422(4)   | 17065(4) | 8862(2) | 72(2)  |
| C(18) | 935(4)   | 15716(4) | 9710(2) | 63(2)  |
| C(19) | 3317(4)  | 15700(4) | 9814(2) | 58(2)  |
| C(20) | 4211(4)  | 17000(4) | 9042(2) | 64(2)  |
| C(21) | 1957(4)  | 12200(4) | 9129(2) | 55(2)  |
| C(22) | 2383(4)  | 12804(4) | 9464(2) | 49(1)  |
| C(23) | 3414(4)  | 12785(3) | 9394(2) | 46(1)  |
| C(24) | 3616(4)  | 12167(4) | 9025(2) | 49(1)  |
| C(25) | 2716(5)  | 11811(3) | 8862(2) | 54(1)  |
| C(26) | 875(5)   | 11941(5) | 9118(3) | 107(3) |
| C(27) | 1824(6)  | 13263(5) | 9861(2) | 96(3)  |
| C(28) | 4199(5)  | 13235(5) | 9701(2) | 86(2)  |
| C(29) | 4646(5)  | 11845(5) | 8877(3) | 98(3)  |
| C(30) | 2625(7)  | 11049(4) | 8499(3) | 124(4) |
| C(31) | 4829(3)  | 16016(3) | 7456(2) | 38(1)  |
| C(32) | 5143(4)  | 15153(3) | 7292(2) | 45(1)  |
| C(33) | 4497(4)  | 14867(3) | 6922(2) | 42(1)  |
| C(34) | 3785(4)  | 15541(3) | 6845(2) | 43(1)  |
| C(35) | 3976(3)  | 16244(3) | 7185(2) | 37(1)  |

|       |          |           |          |         |
|-------|----------|-----------|----------|---------|
| C(36) | 5383(4)  | 16624(4)  | 7796(2)  | 56(2)   |
| C(37) | 6078(4)  | 14675(4)  | 7450(3)  | 74(2)   |
| C(38) | 4648(5)  | 14044(4)  | 6627(2)  | 77(2)   |
| C(39) | 3032(5)  | 15589(4)  | 6444(2)  | 66(2)   |
| C(40) | 3461(2)  | 17121(2)  | 7185(1)  | 55(2)   |
| C(41) | 2307(2)  | 16049(2)  | 11076(1) | 165(4)  |
| C(42) | 1694(2)  | 15309(2)  | 11039(1) | 107(3)  |
| C(43) | 2098(2)  | 14458(2)  | 11047(1) | 161(4)  |
| C(44) | 3116(2)  | 14347(2)  | 11092(1) | 117(3)  |
| C(45) | 3729(2)  | 15087(2)  | 11130(1) | 123(3)  |
| C(46) | 3324(2)  | 15938(2)  | 11122(1) | 90(2)   |
| C(47) | 1825(4)  | 16857(4)  | 11048(2) | 164(4)  |
| C(48) | 2698(4)  | 10227(4)  | 10033(2) | 256(8)  |
| C(49) | 1689(4)  | 10231(4)  | 10131(2) | 334(8)  |
| C(50) | 1142(4)  | 9452(4)   | 10083(2) | 334(8)  |
| C(51) | 1603(4)  | 8670(4)   | 9937(2)  | 294(9)  |
| C(52) | 2612(4)  | 8665(4)   | 9838(2)  | 255(8)  |
| C(53) | 3160(4)  | 9444(4)   | 9887(2)  | 296(10) |
| C(54) | 3360(9)  | 10892(9)  | 10066(3) | 310(10) |
| H(1)  | 2340(30) | 12970(30) | 7949(16) | 46      |
| H(2)  | 1420(30) | 13460(30) | 8207(15) | 46      |
| H(3)  | 1750(30) | 14330(30) | 8897(17) | 46      |
| H(4)  | 3260(30) | 14580(30) | 8862(17) | 46      |
| H(5)  | 3600(30) | 15510(30) | 8275(17) | 46      |
| H(6)  | 2690(30) | 15900(30) | 7949(16) | 46      |
| H(7)  | 2130(30) | 15030(30) | 7419(16) | 46      |
| H(8)  | 2820(30) | 13870(30) | 7343(16) | 46      |

---

$U(\text{eq})$  is defined as one third of the trace of the orthogonalized  $U^{ij}$  tensor.

Table S2. Bond lengths [Å] and angles [°] for  $[(\mu_2\text{-H})_8(\mu_2\text{-Cl})_2(\text{Cp}^*\text{Zr})_4]\cdot 2(\text{C}_7\text{H}_8)$ .

|             |            |              |          |
|-------------|------------|--------------|----------|
| Zr(1)-C(1)  | 2.504(4)   | Zr(4)-H(7)   | 1.96(5)  |
| Zr(1)-C(2)  | 2.507(5)   | Zr(4)-H(8)   | 2.05(5)  |
| Zr(1)-C(3)  | 2.515(5)   | C(1)-C(2)    | 1.412(7) |
| Zr(1)-C(5)  | 2.533(4)   | C(1)-C(5)    | 1.421(6) |
| Zr(1)-C(4)  | 2.536(5)   | C(1)-C(6)    | 1.501(7) |
| Zr(1)-Cl(1) | 2.6206(12) | C(2)-C(3)    | 1.422(7) |
| Zr(1)-Zr(3) | 3.0539(6)  | C(2)-C(7)    | 1.499(7) |
| Zr(1)-Zr(4) | 3.0541(6)  | C(3)-C(4)    | 1.390(7) |
| Zr(1)-Zr(2) | 3.5514(6)  | C(3)-C(8)    | 1.496(8) |
| Zr(1)-H(1)  | 1.90(5)    | C(4)-C(5)    | 1.416(7) |
| Zr(1)-H(2)  | 1.51(4)    | C(4)-C(9)    | 1.508(7) |
| Zr(1)-H(7)  | 2.06(4)    | C(5)-C(10)   | 1.496(7) |
| Zr(1)-H(8)  | 2.04(4)    | C(6)-H(6A)   | 0.9700   |
| Zr(2)-C(14) | 2.510(4)   | C(6)-H(6B)   | 0.9700   |
| Zr(2)-C(13) | 2.525(4)   | C(6)-H(6C)   | 0.9700   |
| Zr(2)-C(15) | 2.527(5)   | C(7)-H(7A)   | 0.9700   |
| Zr(2)-C(11) | 2.534(5)   | C(7)-H(7B)   | 0.9700   |
| Zr(2)-C(12) | 2.537(5)   | C(7)-H(7C)   | 0.9700   |
| Zr(2)-Cl(1) | 2.6176(12) | C(8)-H(8A)   | 0.9700   |
| Zr(2)-Zr(4) | 3.0516(6)  | C(8)-H(8B)   | 0.9700   |
| Zr(2)-Zr(3) | 3.0585(6)  | C(8)-H(8C)   | 0.9700   |
| Zr(2)-H(3)  | 2.03(4)    | C(9)-H(9A)   | 0.9700   |
| Zr(2)-H(4)  | 1.93(5)    | C(9)-H(9B)   | 0.9700   |
| Zr(2)-H(5)  | 1.93(4)    | C(9)-H(9C)   | 0.9700   |
| Zr(2)-H(6)  | 1.99(4)    | C(10)-H(10A) | 0.9700   |
| Zr(3)-C(23) | 2.507(5)   | C(10)-H(10B) | 0.9700   |
| Zr(3)-C(24) | 2.520(5)   | C(10)-H(10C) | 0.9700   |
| Zr(3)-C(22) | 2.520(5)   | C(11)-C(15)  | 1.409(7) |
| Zr(3)-C(21) | 2.524(5)   | C(11)-C(12)  | 1.424(7) |
| Zr(3)-C(25) | 2.530(5)   | C(11)-C(16)  | 1.498(7) |
| Zr(3)-Cl(2) | 2.6239(12) | C(12)-C(13)  | 1.414(7) |
| Zr(3)-Zr(4) | 3.5643(6)  | C(12)-C(17)  | 1.507(7) |
| Zr(3)-H(1)  | 2.06(4)    | C(13)-C(14)  | 1.417(6) |
| Zr(3)-H(2)  | 2.09(5)    | C(13)-C(18)  | 1.515(7) |
| Zr(3)-H(3)  | 2.00(4)    | C(14)-C(15)  | 1.391(7) |
| Zr(3)-H(4)  | 1.97(5)    | C(14)-C(19)  | 1.494(7) |
| Zr(4)-C(35) | 2.511(4)   | C(15)-C(20)  | 1.527(7) |
| Zr(4)-C(33) | 2.524(4)   | C(16)-H(16A) | 0.9700   |
| Zr(4)-C(32) | 2.530(5)   | C(16)-H(16B) | 0.9700   |
| Zr(4)-C(34) | 2.532(5)   | C(16)-H(16C) | 0.9700   |
| Zr(4)-C(31) | 2.539(4)   | C(17)-H(17A) | 0.9700   |
| Zr(4)-Cl(2) | 2.6241(12) | C(17)-H(17B) | 0.9700   |
| Zr(4)-H(5)  | 1.84(5)    | C(17)-H(17C) | 0.9700   |
| Zr(4)-H(6)  | 1.95(4)    | C(18)-H(18A) | 0.9700   |

|                 |           |                 |           |
|-----------------|-----------|-----------------|-----------|
| C(18)-H(18B)    | 0.9700    | C(36)-H(36B)    | 0.9700    |
| C(18)-H(18C)    | 0.9700    | C(36)-H(36C)    | 0.9700    |
| C(19)-H(19A)    | 0.9700    | C(37)-H(37A)    | 0.9700    |
| C(19)-H(19B)    | 0.9700    | C(37)-H(37B)    | 0.9700    |
| C(19)-H(19C)    | 0.9700    | C(37)-H(37C)    | 0.9700    |
| C(20)-H(20A)    | 0.9700    | C(38)-H(38A)    | 0.9700    |
| C(20)-H(20B)    | 0.9700    | C(38)-H(38B)    | 0.9700    |
| C(20)-H(20C)    | 0.9700    | C(38)-H(38C)    | 0.9700    |
| C(21)-C(25)     | 1.390(8)  | C(39)-H(39A)    | 0.9700    |
| C(21)-C(22)     | 1.414(8)  | C(39)-H(39B)    | 0.9700    |
| C(21)-C(26)     | 1.513(8)  | C(39)-H(39C)    | 0.9700    |
| C(22)-C(23)     | 1.407(7)  | C(40)-H(40A)    | 0.9700    |
| C(22)-C(27)     | 1.494(7)  | C(40)-H(40B)    | 0.9700    |
| C(23)-C(24)     | 1.401(7)  | C(40)-H(40C)    | 0.9700    |
| C(23)-C(28)     | 1.512(8)  | C(41)-C(47)     | 1.379(7)  |
| C(24)-C(25)     | 1.401(8)  | C(41)-C(42)     | 1.3899    |
| C(24)-C(29)     | 1.529(7)  | C(41)-C(46)     | 1.3900    |
| C(25)-C(30)     | 1.520(8)  | C(42)-C(43)     | 1.3900    |
| C(26)-H(26A)    | 0.9700    | C(42)-H(42A)    | 0.9400    |
| C(26)-H(26B)    | 0.9700    | C(43)-C(44)     | 1.3900    |
| C(26)-H(26C)    | 0.9700    | C(43)-H(43A)    | 0.9400    |
| C(27)-H(27A)    | 0.9700    | C(44)-C(45)     | 1.3899    |
| C(27)-H(27B)    | 0.9700    | C(44)-H(44A)    | 0.9400    |
| C(27)-H(27C)    | 0.9700    | C(45)-C(46)     | 1.3900    |
| C(28)-H(28A)    | 0.9700    | C(45)-H(45A)    | 0.9400    |
| C(28)-H(28B)    | 0.9700    | C(46)-H(46A)    | 0.9400    |
| C(28)-H(28C)    | 0.9700    | C(47)-H(47A)    | 0.9700    |
| C(29)-H(29A)    | 0.9700    | C(47)-H(47B)    | 0.9700    |
| C(29)-H(29B)    | 0.9700    | C(47)-H(47C)    | 0.9700    |
| C(29)-H(29C)    | 0.9700    | C(48)-C(54)     | 1.343(11) |
| C(30)-H(30A)    | 0.9700    | C(48)-C(53)     | 1.3898    |
| C(30)-H(30B)    | 0.9700    | C(48)-C(49)     | 1.3901    |
| C(30)-H(30C)    | 0.9700    | C(49)-C(50)     | 1.3900    |
| C(31)-C(35)     | 1.414(6)  | C(49)-H(49A)    | 0.9400    |
| C(31)-C(32)     | 1.436(7)  | C(50)-C(51)     | 1.3900    |
| C(31)-C(36)     | 1.504(7)  | C(50)-H(50A)    | 0.9400    |
| C(32)-C(33)     | 1.407(7)  | C(51)-C(52)     | 1.3900    |
| C(32)-C(37)     | 1.516(7)  | C(51)-H(51A)    | 0.9400    |
| C(33)-C(34)     | 1.412(7)  | C(52)-C(53)     | 1.3901    |
| C(33)-C(38)     | 1.491(7)  | C(52)-H(52A)    | 0.9400    |
| C(34)-C(35)     | 1.432(7)  | C(53)-H(53A)    | 0.9400    |
| C(34)-C(39)     | 1.501(7)  | C(54)-H(54A)    | 0.9700    |
| C(35)-C(40)     | 1.489(5)  | C(54)-H(54B)    | 0.9700    |
| C(36)-H(36A)    | 0.9700    | C(54)-H(54C)    | 0.9700    |
| C(1)-Zr(1)-C(2) | 32.74(15) | C(1)-Zr(1)-C(3) | 54.27(16) |

|                   |            |                   |            |
|-------------------|------------|-------------------|------------|
| C(2)-Zr(1)-C(3)   | 32.90(16)  | C(5)-Zr(1)-H(2)   | 80.7(17)   |
| C(1)-Zr(1)-C(5)   | 32.76(15)  | C(4)-Zr(1)-H(2)   | 101.6(17)  |
| C(2)-Zr(1)-C(5)   | 53.89(15)  | Cl(1)-Zr(1)-H(2)  | 83.2(17)   |
| C(3)-Zr(1)-C(5)   | 53.49(16)  | Zr(3)-Zr(1)-H(2)  | 38.2(17)   |
| C(1)-Zr(1)-C(4)   | 54.20(15)  | Zr(4)-Zr(1)-H(2)  | 108.8(17)  |
| C(2)-Zr(1)-C(4)   | 53.86(15)  | Zr(2)-Zr(1)-H(2)  | 72.8(17)   |
| C(3)-Zr(1)-C(4)   | 31.95(17)  | H(1)-Zr(1)-H(2)   | 55(2)      |
| C(5)-Zr(1)-C(4)   | 32.44(16)  | C(1)-Zr(1)-H(7)   | 124.2(13)  |
| C(1)-Zr(1)-Cl(1)  | 137.03(11) | C(2)-Zr(1)-H(7)   | 92.2(13)   |
| C(2)-Zr(1)-Cl(1)  | 128.98(12) | C(3)-Zr(1)-H(7)   | 84.6(13)   |
| C(3)-Zr(1)-Cl(1)  | 96.15(12)  | C(5)-Zr(1)-H(7)   | 138.1(13)  |
| C(5)-Zr(1)-Cl(1)  | 105.81(11) | C(4)-Zr(1)-H(7)   | 109.7(13)  |
| C(4)-Zr(1)-Cl(1)  | 83.92(11)  | Cl(1)-Zr(1)-H(7)  | 74.9(12)   |
| C(1)-Zr(1)-Zr(3)  | 113.38(11) | Zr(3)-Zr(1)-H(7)  | 107.6(13)  |
| C(2)-Zr(1)-Zr(3)  | 138.76(12) | Zr(4)-Zr(1)-H(7)  | 39.5(13)   |
| C(3)-Zr(1)-Zr(3)  | 166.94(12) | Zr(2)-Zr(1)-H(7)  | 67.0(13)   |
| C(5)-Zr(1)-Zr(3)  | 114.19(12) | H(1)-Zr(1)-H(7)   | 120.5(18)  |
| C(4)-Zr(1)-Zr(3)  | 139.71(13) | H(2)-Zr(1)-H(7)   | 139(2)     |
| Cl(1)-Zr(1)-Zr(3) | 91.55(3)   | C(1)-Zr(1)-H(8)   | 87.3(13)   |
| C(1)-Zr(1)-Zr(4)  | 129.12(11) | C(2)-Zr(1)-H(8)   | 72.6(13)   |
| C(2)-Zr(1)-Zr(4)  | 109.86(11) | C(3)-Zr(1)-H(8)   | 95.6(13)   |
| C(3)-Zr(1)-Zr(4)  | 118.83(13) | C(5)-Zr(1)-H(8)   | 120.0(13)  |
| C(5)-Zr(1)-Zr(4)  | 161.75(11) | C(4)-Zr(1)-H(8)   | 125.4(13)  |
| C(4)-Zr(1)-Zr(4)  | 148.38(14) | Cl(1)-Zr(1)-H(8)  | 130.0(13)  |
| Cl(1)-Zr(1)-Zr(4) | 91.03(3)   | Zr(3)-Zr(1)-H(8)  | 87.5(13)   |
| Zr(3)-Zr(1)-Zr(4) | 71.402(15) | Zr(4)-Zr(1)-H(8)  | 41.8(13)   |
| C(1)-Zr(1)-Zr(2)  | 167.31(11) | Zr(2)-Zr(1)-H(8)  | 95.4(13)   |
| C(2)-Zr(1)-Zr(2)  | 159.22(11) | H(1)-Zr(1)-H(8)   | 69.3(18)   |
| C(3)-Zr(1)-Zr(2)  | 137.34(12) | H(2)-Zr(1)-H(8)   | 121(2)     |
| C(5)-Zr(1)-Zr(2)  | 143.50(11) | H(7)-Zr(1)-H(8)   | 58.1(18)   |
| C(4)-Zr(1)-Zr(2)  | 131.01(11) | C(14)-Zr(2)-C(13) | 32.68(14)  |
| Cl(1)-Zr(1)-Zr(2) | 47.28(3)   | C(14)-Zr(2)-C(15) | 32.05(15)  |
| Zr(3)-Zr(1)-Zr(2) | 54.538(13) | C(13)-Zr(2)-C(15) | 53.63(15)  |
| Zr(4)-Zr(1)-Zr(2) | 54.400(12) | C(14)-Zr(2)-C(11) | 53.64(15)  |
| C(1)-Zr(1)-H(1)   | 75.3(14)   | C(13)-Zr(2)-C(11) | 53.94(16)  |
| C(2)-Zr(1)-H(1)   | 97.3(13)   | C(15)-Zr(2)-C(11) | 32.33(15)  |
| C(3)-Zr(1)-H(1)   | 128.3(14)  | C(14)-Zr(2)-C(12) | 53.75(15)  |
| C(5)-Zr(1)-H(1)   | 90.7(14)   | C(13)-Zr(2)-C(12) | 32.44(16)  |
| C(4)-Zr(1)-H(1)   | 123.1(14)  | C(15)-Zr(2)-C(12) | 53.58(16)  |
| Cl(1)-Zr(1)-H(1)  | 132.1(13)  | C(11)-Zr(2)-C(12) | 32.61(16)  |
| Zr(3)-Zr(1)-H(1)  | 41.5(13)   | C(14)-Zr(2)-Cl(1) | 130.50(11) |
| Zr(4)-Zr(1)-H(1)  | 82.8(13)   | C(13)-Zr(2)-Cl(1) | 97.88(11)  |
| Zr(2)-Zr(1)-H(1)  | 94.1(14)   | C(15)-Zr(2)-Cl(1) | 133.99(12) |
| C(1)-Zr(1)-H(2)   | 95.2(17)   | C(11)-Zr(2)-Cl(1) | 102.60(12) |
| C(2)-Zr(1)-H(2)   | 127.9(17)  | C(12)-Zr(2)-Cl(1) | 82.66(12)  |
| C(3)-Zr(1)-H(2)   | 132.4(17)  | C(14)-Zr(2)-Zr(4) | 137.17(11) |

|                   |            |                   |            |
|-------------------|------------|-------------------|------------|
| C(13)-Zr(2)-Zr(4) | 167.40(11) | Zr(3)-Zr(2)-H(5)  | 85.1(13)   |
| C(15)-Zr(2)-Zr(4) | 113.81(11) | Zr(1)-Zr(2)-H(5)  | 88.7(14)   |
| C(11)-Zr(2)-Zr(4) | 115.52(11) | H(3)-Zr(2)-H(5)   | 125.0(18)  |
| C(12)-Zr(2)-Zr(4) | 142.06(12) | H(4)-Zr(2)-H(5)   | 68.9(19)   |
| Cl(1)-Zr(2)-Zr(4) | 91.14(3)   | C(14)-Zr(2)-H(6)  | 128.1(14)  |
| C(14)-Zr(2)-Zr(3) | 110.99(11) | C(13)-Zr(2)-H(6)  | 134.6(13)  |
| C(13)-Zr(2)-Zr(3) | 116.91(12) | C(15)-Zr(2)-H(6)  | 96.0(14)   |
| C(15)-Zr(2)-Zr(3) | 132.07(11) | C(11)-Zr(2)-H(6)  | 82.1(13)   |
| C(11)-Zr(2)-Zr(3) | 163.88(11) | C(12)-Zr(2)-H(6)  | 103.6(13)  |
| C(12)-Zr(2)-Zr(3) | 145.78(12) | Cl(1)-Zr(2)-H(6)  | 79.7(13)   |
| Cl(1)-Zr(2)-Zr(3) | 91.50(3)   | Zr(4)-Zr(2)-H(6)  | 38.7(13)   |
| Zr(4)-Zr(2)-Zr(3) | 71.374(14) | Zr(3)-Zr(2)-H(6)  | 108.5(13)  |
| C(14)-Zr(2)-Zr(1) | 161.20(11) | Zr(1)-Zr(2)-H(6)  | 70.6(13)   |
| C(13)-Zr(2)-Zr(1) | 137.80(11) | H(3)-Zr(2)-H(6)   | 137.0(19)  |
| C(15)-Zr(2)-Zr(1) | 166.51(11) | H(4)-Zr(2)-H(6)   | 114.2(19)  |
| C(11)-Zr(2)-Zr(1) | 141.68(11) | H(5)-Zr(2)-H(6)   | 49.2(18)   |
| C(12)-Zr(2)-Zr(1) | 129.99(11) | C(23)-Zr(3)-C(24) | 32.36(17)  |
| Cl(1)-Zr(2)-Zr(1) | 47.35(3)   | C(23)-Zr(3)-C(22) | 32.52(16)  |
| Zr(4)-Zr(2)-Zr(1) | 54.466(12) | C(24)-Zr(3)-C(22) | 53.49(15)  |
| Zr(3)-Zr(2)-Zr(1) | 54.418(13) | C(23)-Zr(3)-C(21) | 53.79(17)  |
| C(14)-Zr(2)-H(3)  | 94.7(13)   | C(24)-Zr(3)-C(21) | 53.24(17)  |
| C(13)-Zr(2)-H(3)  | 83.2(13)   | C(22)-Zr(3)-C(21) | 32.56(18)  |
| C(15)-Zr(2)-H(3)  | 126.7(13)  | C(23)-Zr(3)-C(25) | 53.63(17)  |
| C(11)-Zr(2)-H(3)  | 136.6(13)  | C(24)-Zr(3)-C(25) | 32.22(18)  |
| C(12)-Zr(2)-H(3)  | 106.3(13)  | C(22)-Zr(3)-C(25) | 53.47(17)  |
| Cl(1)-Zr(2)-H(3)  | 74.4(13)   | C(21)-Zr(3)-C(25) | 31.93(18)  |
| Zr(4)-Zr(2)-H(3)  | 107.9(12)  | C(23)-Zr(3)-Cl(2) | 97.57(12)  |
| Zr(3)-Zr(2)-H(3)  | 40.2(12)   | C(24)-Zr(3)-Cl(2) | 82.89(11)  |
| Zr(1)-Zr(2)-H(3)  | 66.5(13)   | C(22)-Zr(3)-Cl(2) | 130.06(12) |
| C(14)-Zr(2)-H(4)  | 80.2(14)   | C(21)-Zr(3)-Cl(2) | 133.95(14) |
| C(13)-Zr(2)-H(4)  | 102.0(14)  | C(25)-Zr(3)-Cl(2) | 102.91(15) |
| C(15)-Zr(2)-H(4)  | 93.8(14)   | C(23)-Zr(3)-Zr(1) | 167.50(12) |
| C(11)-Zr(2)-H(4)  | 126.1(14)  | C(24)-Zr(3)-Zr(1) | 141.50(14) |
| C(12)-Zr(2)-H(4)  | 132.7(14)  | C(22)-Zr(3)-Zr(1) | 137.85(13) |
| Cl(1)-Zr(2)-H(4)  | 130.0(14)  | C(21)-Zr(3)-Zr(1) | 113.82(13) |
| Zr(4)-Zr(2)-H(4)  | 78.5(13)   | C(25)-Zr(3)-Zr(1) | 115.53(13) |
| Zr(3)-Zr(2)-H(4)  | 38.7(14)   | Cl(2)-Zr(3)-Zr(1) | 90.92(3)   |
| Zr(1)-Zr(2)-H(4)  | 90.2(14)   | C(23)-Zr(3)-Zr(2) | 117.67(13) |
| H(3)-Zr(2)-H(4)   | 63.3(18)   | C(24)-Zr(3)-Zr(2) | 146.65(14) |
| C(14)-Zr(2)-H(5)  | 102.5(14)  | C(22)-Zr(3)-Zr(2) | 111.38(12) |
| C(13)-Zr(2)-H(5)  | 133.4(14)  | C(21)-Zr(3)-Zr(2) | 132.48(14) |
| C(15)-Zr(2)-H(5)  | 80.7(14)   | C(25)-Zr(3)-Zr(2) | 163.94(13) |
| C(11)-Zr(2)-H(5)  | 93.4(13)   | Cl(2)-Zr(3)-Zr(2) | 91.30(3)   |
| C(12)-Zr(2)-H(5)  | 126.0(13)  | Zr(1)-Zr(3)-Zr(2) | 71.044(15) |
| Cl(1)-Zr(2)-H(5)  | 123.5(14)  | C(23)-Zr(3)-Zr(4) | 137.69(12) |
| Zr(4)-Zr(2)-H(5)  | 34.8(14)   | C(24)-Zr(3)-Zr(4) | 130.08(11) |



|                   |            |                   |            |
|-------------------|------------|-------------------|------------|
| C(22)-Zr(3)-Zr(4) | 161.02(14) | H(2)-Zr(3)-H(4)   | 118.9(18)  |
| C(21)-Zr(3)-Zr(4) | 166.25(14) | H(3)-Zr(3)-H(4)   | 63.3(18)   |
| C(25)-Zr(3)-Zr(4) | 141.79(13) | C(35)-Zr(4)-C(33) | 54.38(15)  |
| Cl(2)-Zr(3)-Zr(4) | 47.22(3)   | C(35)-Zr(4)-C(32) | 54.10(15)  |
| Zr(1)-Zr(3)-Zr(4) | 54.302(12) | C(33)-Zr(4)-C(32) | 32.33(17)  |
| Zr(2)-Zr(3)-Zr(4) | 54.223(12) | C(35)-Zr(4)-C(34) | 32.98(15)  |
| C(23)-Zr(3)-H(1)  | 135.8(13)  | C(33)-Zr(4)-C(34) | 32.43(16)  |
| C(24)-Zr(3)-H(1)  | 104.3(13)  | C(32)-Zr(4)-C(34) | 53.60(16)  |
| C(22)-Zr(3)-H(1)  | 130.8(13)  | C(35)-Zr(4)-C(31) | 32.51(15)  |
| C(21)-Zr(3)-H(1)  | 98.2(13)   | C(33)-Zr(4)-C(31) | 54.25(15)  |
| C(25)-Zr(3)-H(1)  | 84.1(13)   | C(32)-Zr(4)-C(31) | 32.91(16)  |
| Cl(2)-Zr(3)-H(1)  | 77.8(12)   | C(34)-Zr(4)-C(31) | 54.04(15)  |
| Zr(1)-Zr(3)-H(1)  | 37.6(13)   | C(35)-Zr(4)-Cl(2) | 136.69(11) |
| Zr(2)-Zr(3)-H(1)  | 106.5(13)  | C(33)-Zr(4)-Cl(2) | 97.07(12)  |
| Zr(4)-Zr(3)-H(1)  | 68.2(12)   | C(32)-Zr(4)-Cl(2) | 84.03(11)  |
| C(23)-Zr(3)-H(2)  | 142.0(12)  | C(34)-Zr(4)-Cl(2) | 129.48(12) |
| C(24)-Zr(3)-H(2)  | 131.0(13)  | C(31)-Zr(4)-Cl(2) | 105.54(11) |
| C(22)-Zr(3)-H(2)  | 111.5(12)  | C(35)-Zr(4)-Zr(2) | 112.88(11) |
| C(21)-Zr(3)-H(2)  | 88.8(12)   | C(33)-Zr(4)-Zr(2) | 166.90(11) |
| C(25)-Zr(3)-H(2)  | 99.1(13)   | C(32)-Zr(4)-Zr(2) | 140.22(13) |
| Cl(2)-Zr(3)-H(2)  | 115.8(11)  | C(34)-Zr(4)-Zr(2) | 138.27(12) |
| Zr(1)-Zr(3)-H(2)  | 26.5(12)   | C(31)-Zr(4)-Zr(2) | 113.82(11) |
| Zr(2)-Zr(3)-H(2)  | 80.9(12)   | Cl(2)-Zr(4)-Zr(2) | 91.45(3)   |
| Zr(4)-Zr(3)-H(2)  | 80.3(12)   | C(35)-Zr(4)-Zr(1) | 129.96(11) |
| H(1)-Zr(3)-H(2)   | 45.6(16)   | C(33)-Zr(4)-Zr(1) | 118.45(12) |
| C(23)-Zr(3)-H(3)  | 101.7(13)  | C(32)-Zr(4)-Zr(1) | 148.13(13) |
| C(24)-Zr(3)-H(3)  | 131.7(13)  | C(34)-Zr(4)-Zr(1) | 110.41(11) |
| C(22)-Zr(3)-H(3)  | 78.9(13)   | C(31)-Zr(4)-Zr(1) | 162.38(11) |
| C(21)-Zr(3)-H(3)  | 92.0(13)   | Cl(2)-Zr(4)-Zr(1) | 90.91(3)   |
| C(25)-Zr(3)-H(3)  | 123.9(13)  | Zr(2)-Zr(4)-Zr(1) | 71.133(14) |
| Cl(2)-Zr(3)-H(3)  | 132.0(13)  | C(35)-Zr(4)-Zr(3) | 166.44(11) |
| Zr(1)-Zr(3)-H(3)  | 78.9(13)   | C(33)-Zr(4)-Zr(3) | 137.92(11) |
| Zr(2)-Zr(3)-H(3)  | 41.0(13)   | C(32)-Zr(4)-Zr(3) | 131.08(11) |
| Zr(4)-Zr(3)-H(3)  | 92.1(13)   | C(34)-Zr(4)-Zr(3) | 159.94(11) |
| H(1)-Zr(3)-H(3)   | 113.9(18)  | C(31)-Zr(4)-Zr(3) | 142.87(11) |
| H(2)-Zr(3)-H(3)   | 69.8(18)   | Cl(2)-Zr(4)-Zr(3) | 47.22(3)   |
| C(23)-Zr(3)-H(4)  | 85.7(14)   | Zr(2)-Zr(4)-Zr(3) | 54.403(12) |
| C(24)-Zr(3)-H(4)  | 109.5(14)  | Zr(1)-Zr(4)-Zr(3) | 54.296(12) |
| C(22)-Zr(3)-H(4)  | 95.8(14)   | C(35)-Zr(4)-H(5)  | 94.7(14)   |
| C(21)-Zr(3)-H(4)  | 128.1(13)  | C(33)-Zr(4)-H(5)  | 134.1(14)  |
| C(25)-Zr(3)-H(4)  | 139.0(14)  | C(32)-Zr(4)-H(5)  | 103.3(14)  |
| Cl(2)-Zr(3)-H(4)  | 75.1(13)   | C(34)-Zr(4)-H(5)  | 127.7(14)  |
| Zr(1)-Zr(3)-H(4)  | 105.5(14)  | C(31)-Zr(4)-H(5)  | 81.2(14)   |
| Zr(2)-Zr(3)-H(4)  | 38.0(13)   | Cl(2)-Zr(4)-H(5)  | 83.7(14)   |
| Zr(4)-Zr(3)-H(4)  | 65.2(14)   | Zr(2)-Zr(4)-H(5)  | 37.0(14)   |
| H(1)-Zr(3)-H(4)   | 133.0(19)  | Zr(1)-Zr(4)-H(5)  | 107.4(14)  |

|                   |           |                   |          |
|-------------------|-----------|-------------------|----------|
| Zr(3)-Zr(4)-H(5)  | 72.2(14)  | C(3)-C(2)-Zr(1)   | 73.9(3)  |
| C(35)-Zr(4)-H(6)  | 75.9(13)  | C(7)-C(2)-Zr(1)   | 124.9(3) |
| C(33)-Zr(4)-H(6)  | 129.1(13) | C(4)-C(3)-C(2)    | 108.6(5) |
| C(32)-Zr(4)-H(6)  | 122.9(13) | C(4)-C(3)-C(8)    | 124.9(5) |
| C(34)-Zr(4)-H(6)  | 98.7(13)  | C(2)-C(3)-C(8)    | 126.1(6) |
| C(31)-Zr(4)-H(6)  | 90.1(13)  | C(4)-C(3)-Zr(1)   | 74.9(3)  |
| Cl(2)-Zr(4)-H(6)  | 129.6(13) | C(2)-C(3)-Zr(1)   | 73.2(3)  |
| Zr(2)-Zr(4)-H(6)  | 39.7(13)  | C(8)-C(3)-Zr(1)   | 123.6(4) |
| Zr(1)-Zr(4)-H(6)  | 84.0(14)  | C(3)-C(4)-C(5)    | 108.1(4) |
| Zr(3)-Zr(4)-H(6)  | 92.8(13)  | C(3)-C(4)-C(9)    | 127.3(5) |
| H(5)-Zr(4)-H(6)   | 51.1(19)  | C(5)-C(4)-C(9)    | 124.3(5) |
| C(35)-Zr(4)-H(7)  | 88.5(13)  | C(3)-C(4)-Zr(1)   | 73.2(3)  |
| C(33)-Zr(4)-H(7)  | 101.0(13) | C(5)-C(4)-Zr(1)   | 73.7(3)  |
| C(32)-Zr(4)-H(7)  | 130.3(13) | C(9)-C(4)-Zr(1)   | 123.2(3) |
| C(34)-Zr(4)-H(7)  | 77.1(13)  | C(4)-C(5)-C(1)    | 108.1(4) |
| C(31)-Zr(4)-H(7)  | 121.0(13) | C(4)-C(5)-C(10)   | 127.0(5) |
| Cl(2)-Zr(4)-H(7)  | 132.1(13) | C(1)-C(5)-C(10)   | 124.5(5) |
| Zr(2)-Zr(4)-H(7)  | 80.2(13)  | C(4)-C(5)-Zr(1)   | 73.9(3)  |
| Zr(1)-Zr(4)-H(7)  | 41.7(13)  | C(1)-C(5)-Zr(1)   | 72.5(2)  |
| Zr(3)-Zr(4)-H(7)  | 93.2(13)  | C(10)-C(5)-Zr(1)  | 125.7(3) |
| H(5)-Zr(4)-H(7)   | 112.1(19) | C(1)-C(6)-H(6A)   | 109.5    |
| H(6)-Zr(4)-H(7)   | 64.7(19)  | C(1)-C(6)-H(6B)   | 109.5    |
| C(35)-Zr(4)-H(8)  | 117.9(12) | H(6A)-C(6)-H(6B)  | 109.5    |
| C(33)-Zr(4)-H(8)  | 79.7(12)  | C(1)-C(6)-H(6C)   | 109.5    |
| C(32)-Zr(4)-H(8)  | 106.8(12) | H(6A)-C(6)-H(6C)  | 109.5    |
| C(34)-Zr(4)-H(8)  | 85.8(12)  | H(6B)-C(6)-H(6C)  | 109.5    |
| C(31)-Zr(4)-H(8)  | 133.8(12) | C(2)-C(7)-H(7A)   | 109.5    |
| Cl(2)-Zr(4)-H(8)  | 81.3(13)  | C(2)-C(7)-H(7B)   | 109.5    |
| Zr(2)-Zr(4)-H(8)  | 111.6(12) | H(7A)-C(7)-H(7B)  | 109.5    |
| Zr(1)-Zr(4)-H(8)  | 41.4(12)  | C(2)-C(7)-H(7C)   | 109.5    |
| Zr(3)-Zr(4)-H(8)  | 74.1(12)  | H(7A)-C(7)-H(7C)  | 109.5    |
| H(5)-Zr(4)-H(8)   | 144.6(19) | H(7B)-C(7)-H(7C)  | 109.5    |
| H(6)-Zr(4)-H(8)   | 121.1(18) | C(3)-C(8)-H(8A)   | 109.5    |
| H(7)-Zr(4)-H(8)   | 59.3(18)  | C(3)-C(8)-H(8B)   | 109.5    |
| Zr(2)-Cl(1)-Zr(1) | 85.37(3)  | H(8A)-C(8)-H(8B)  | 109.5    |
| Zr(3)-Cl(2)-Zr(4) | 85.56(3)  | C(3)-C(8)-H(8C)   | 109.5    |
| C(2)-C(1)-C(5)    | 107.5(4)  | H(8A)-C(8)-H(8C)  | 109.5    |
| C(2)-C(1)-C(6)    | 125.2(5)  | H(8B)-C(8)-H(8C)  | 109.5    |
| C(5)-C(1)-C(6)    | 126.7(5)  | C(4)-C(9)-H(9A)   | 109.5    |
| C(2)-C(1)-Zr(1)   | 73.7(3)   | C(4)-C(9)-H(9B)   | 109.5    |
| C(5)-C(1)-Zr(1)   | 74.8(3)   | H(9A)-C(9)-H(9B)  | 109.5    |
| C(6)-C(1)-Zr(1)   | 124.1(3)  | C(4)-C(9)-H(9C)   | 109.5    |
| C(1)-C(2)-C(3)    | 107.7(4)  | H(9A)-C(9)-H(9C)  | 109.5    |
| C(1)-C(2)-C(7)    | 124.3(5)  | H(9B)-C(9)-H(9C)  | 109.5    |
| C(3)-C(2)-C(7)    | 127.5(5)  | C(5)-C(10)-H(10A) | 109.5    |
| C(1)-C(2)-Zr(1)   | 73.5(3)   | C(5)-C(10)-H(10B) | 109.5    |

|                     |          |                     |          |
|---------------------|----------|---------------------|----------|
| H(10A)-C(10)-H(10B) | 109.5    | C(13)-C(18)-H(18A)  | 109.5    |
| C(5)-C(10)-H(10C)   | 109.5    | C(13)-C(18)-H(18B)  | 109.5    |
| H(10A)-C(10)-H(10C) | 109.5    | H(18A)-C(18)-H(18B) | 109.5    |
| H(10B)-C(10)-H(10C) | 109.5    | C(13)-C(18)-H(18C)  | 109.5    |
| C(15)-C(11)-C(12)   | 107.4(4) | H(18A)-C(18)-H(18C) | 109.5    |
| C(15)-C(11)-C(16)   | 127.1(5) | H(18B)-C(18)-H(18C) | 109.5    |
| C(12)-C(11)-C(16)   | 125.1(5) | C(14)-C(19)-H(19A)  | 109.5    |
| C(15)-C(11)-Zr(2)   | 73.6(3)  | C(14)-C(19)-H(19B)  | 109.5    |
| C(12)-C(11)-Zr(2)   | 73.8(3)  | H(19A)-C(19)-H(19B) | 109.5    |
| C(16)-C(11)-Zr(2)   | 124.6(3) | C(14)-C(19)-H(19C)  | 109.5    |
| C(13)-C(12)-C(11)   | 107.9(4) | H(19A)-C(19)-H(19C) | 109.5    |
| C(13)-C(12)-C(17)   | 126.9(5) | H(19B)-C(19)-H(19C) | 109.5    |
| C(11)-C(12)-C(17)   | 124.7(5) | C(15)-C(20)-H(20A)  | 109.5    |
| C(13)-C(12)-Zr(2)   | 73.3(3)  | C(15)-C(20)-H(20B)  | 109.5    |
| C(11)-C(12)-Zr(2)   | 73.6(3)  | H(20A)-C(20)-H(20B) | 109.5    |
| C(17)-C(12)-Zr(2)   | 125.1(3) | C(15)-C(20)-H(20C)  | 109.5    |
| C(12)-C(13)-C(14)   | 107.4(4) | H(20A)-C(20)-H(20C) | 109.5    |
| C(12)-C(13)-C(18)   | 123.8(5) | H(20B)-C(20)-H(20C) | 109.5    |
| C(14)-C(13)-C(18)   | 128.5(5) | C(25)-C(21)-C(22)   | 108.2(5) |
| C(12)-C(13)-Zr(2)   | 74.2(3)  | C(25)-C(21)-C(26)   | 126.5(6) |
| C(14)-C(13)-Zr(2)   | 73.1(2)  | C(22)-C(21)-C(26)   | 124.8(6) |
| C(18)-C(13)-Zr(2)   | 123.7(3) | C(25)-C(21)-Zr(3)   | 74.3(3)  |
| C(15)-C(14)-C(13)   | 108.6(4) | C(22)-C(21)-Zr(3)   | 73.5(3)  |
| C(15)-C(14)-C(19)   | 125.1(5) | C(26)-C(21)-Zr(3)   | 124.5(4) |
| C(13)-C(14)-C(19)   | 125.7(5) | C(23)-C(22)-C(21)   | 107.5(5) |
| C(15)-C(14)-Zr(2)   | 74.6(3)  | C(23)-C(22)-C(27)   | 127.6(6) |
| C(13)-C(14)-Zr(2)   | 74.2(3)  | C(21)-C(22)-C(27)   | 124.4(6) |
| C(19)-C(14)-Zr(2)   | 124.7(3) | C(23)-C(22)-Zr(3)   | 73.2(3)  |
| C(14)-C(15)-C(11)   | 108.8(4) | C(21)-C(22)-Zr(3)   | 73.9(3)  |
| C(14)-C(15)-C(20)   | 125.0(5) | C(27)-C(22)-Zr(3)   | 125.0(4) |
| C(11)-C(15)-C(20)   | 125.8(5) | C(24)-C(23)-C(22)   | 107.7(5) |
| C(14)-C(15)-Zr(2)   | 73.3(3)  | C(24)-C(23)-C(28)   | 124.2(5) |
| C(11)-C(15)-Zr(2)   | 74.1(3)  | C(22)-C(23)-C(28)   | 127.5(5) |
| C(20)-C(15)-Zr(2)   | 125.2(3) | C(24)-C(23)-Zr(3)   | 74.3(3)  |
| C(11)-C(16)-H(16A)  | 109.5    | C(22)-C(23)-Zr(3)   | 74.2(3)  |
| C(11)-C(16)-H(16B)  | 109.5    | C(28)-C(23)-Zr(3)   | 123.9(4) |
| H(16A)-C(16)-H(16B) | 109.5    | C(25)-C(24)-C(23)   | 108.4(5) |
| C(11)-C(16)-H(16C)  | 109.5    | C(25)-C(24)-C(29)   | 125.8(6) |
| H(16A)-C(16)-H(16C) | 109.5    | C(23)-C(24)-C(29)   | 125.3(6) |
| H(16B)-C(16)-H(16C) | 109.5    | C(25)-C(24)-Zr(3)   | 74.3(3)  |
| C(12)-C(17)-H(17A)  | 109.5    | C(23)-C(24)-Zr(3)   | 73.3(3)  |
| C(12)-C(17)-H(17B)  | 109.5    | C(29)-C(24)-Zr(3)   | 124.8(3) |
| H(17A)-C(17)-H(17B) | 109.5    | C(21)-C(25)-C(24)   | 108.1(5) |
| C(12)-C(17)-H(17C)  | 109.5    | C(21)-C(25)-C(30)   | 127.0(7) |
| H(17A)-C(17)-H(17C) | 109.5    | C(24)-C(25)-C(30)   | 124.5(6) |
| H(17B)-C(17)-H(17C) | 109.5    | C(21)-C(25)-Zr(3)   | 73.8(3)  |

|                     |          |                     |          |
|---------------------|----------|---------------------|----------|
| C(24)-C(25)-Zr(3)   | 73.5(3)  | C(34)-C(33)-C(38)   | 127.3(5) |
| C(30)-C(25)-Zr(3)   | 124.3(4) | C(32)-C(33)-Zr(4)   | 74.1(3)  |
| C(21)-C(26)-H(26A)  | 109.5    | C(34)-C(33)-Zr(4)   | 74.1(3)  |
| C(21)-C(26)-H(26B)  | 109.5    | C(38)-C(33)-Zr(4)   | 123.9(3) |
| H(26A)-C(26)-H(26B) | 109.5    | C(33)-C(34)-C(35)   | 108.0(4) |
| C(21)-C(26)-H(26C)  | 109.5    | C(33)-C(34)-C(39)   | 127.2(5) |
| H(26A)-C(26)-H(26C) | 109.5    | C(35)-C(34)-C(39)   | 124.4(5) |
| H(26B)-C(26)-H(26C) | 109.5    | C(33)-C(34)-Zr(4)   | 73.4(3)  |
| C(22)-C(27)-H(27A)  | 109.5    | C(35)-C(34)-Zr(4)   | 72.7(3)  |
| C(22)-C(27)-H(27B)  | 109.5    | C(39)-C(34)-Zr(4)   | 125.3(3) |
| H(27A)-C(27)-H(27B) | 109.5    | C(31)-C(35)-C(34)   | 108.1(4) |
| C(22)-C(27)-H(27C)  | 109.5    | C(31)-C(35)-C(40)   | 126.5(4) |
| H(27A)-C(27)-H(27C) | 109.5    | C(34)-C(35)-C(40)   | 124.6(4) |
| H(27B)-C(27)-H(27C) | 109.5    | C(31)-C(35)-Zr(4)   | 74.8(3)  |
| C(23)-C(28)-H(28A)  | 109.5    | C(34)-C(35)-Zr(4)   | 74.3(3)  |
| C(23)-C(28)-H(28B)  | 109.5    | C(40)-C(35)-Zr(4)   | 124.7(3) |
| H(28A)-C(28)-H(28B) | 109.5    | C(31)-C(36)-H(36A)  | 109.5    |
| C(23)-C(28)-H(28C)  | 109.5    | C(31)-C(36)-H(36B)  | 109.5    |
| H(28A)-C(28)-H(28C) | 109.5    | H(36A)-C(36)-H(36B) | 109.5    |
| H(28B)-C(28)-H(28C) | 109.5    | C(31)-C(36)-H(36C)  | 109.5    |
| C(24)-C(29)-H(29A)  | 109.5    | H(36A)-C(36)-H(36C) | 109.5    |
| C(24)-C(29)-H(29B)  | 109.5    | H(36B)-C(36)-H(36C) | 109.5    |
| H(29A)-C(29)-H(29B) | 109.5    | C(32)-C(37)-H(37A)  | 109.5    |
| C(24)-C(29)-H(29C)  | 109.5    | C(32)-C(37)-H(37B)  | 109.5    |
| H(29A)-C(29)-H(29C) | 109.5    | H(37A)-C(37)-H(37B) | 109.5    |
| H(29B)-C(29)-H(29C) | 109.5    | C(32)-C(37)-H(37C)  | 109.5    |
| C(25)-C(30)-H(30A)  | 109.5    | H(37A)-C(37)-H(37C) | 109.5    |
| C(25)-C(30)-H(30B)  | 109.5    | H(37B)-C(37)-H(37C) | 109.5    |
| H(30A)-C(30)-H(30B) | 109.5    | C(33)-C(38)-H(38A)  | 109.5    |
| C(25)-C(30)-H(30C)  | 109.5    | C(33)-C(38)-H(38B)  | 109.5    |
| H(30A)-C(30)-H(30C) | 109.5    | H(38A)-C(38)-H(38B) | 109.5    |
| H(30B)-C(30)-H(30C) | 109.5    | C(33)-C(38)-H(38C)  | 109.5    |
| C(35)-C(31)-C(32)   | 107.1(4) | H(38A)-C(38)-H(38C) | 109.5    |
| C(35)-C(31)-C(36)   | 125.8(5) | H(38B)-C(38)-H(38C) | 109.5    |
| C(32)-C(31)-C(36)   | 126.5(5) | C(34)-C(39)-H(39A)  | 109.5    |
| C(35)-C(31)-Zr(4)   | 72.7(3)  | C(34)-C(39)-H(39B)  | 109.5    |
| C(32)-C(31)-Zr(4)   | 73.2(3)  | H(39A)-C(39)-H(39B) | 109.5    |
| C(36)-C(31)-Zr(4)   | 126.4(3) | C(34)-C(39)-H(39C)  | 109.5    |
| C(33)-C(32)-C(31)   | 108.6(4) | H(39A)-C(39)-H(39C) | 109.5    |
| C(33)-C(32)-C(37)   | 125.3(5) | H(39B)-C(39)-H(39C) | 109.5    |
| C(31)-C(32)-C(37)   | 125.8(5) | C(35)-C(40)-H(40A)  | 109.5    |
| C(33)-C(32)-Zr(4)   | 73.6(3)  | C(35)-C(40)-H(40B)  | 109.5    |
| C(31)-C(32)-Zr(4)   | 73.9(3)  | H(40A)-C(40)-H(40B) | 109.5    |
| C(37)-C(32)-Zr(4)   | 123.7(3) | C(35)-C(40)-H(40C)  | 109.5    |
| C(32)-C(33)-C(34)   | 108.1(4) | H(40A)-C(40)-H(40C) | 109.5    |
| C(32)-C(33)-C(38)   | 124.1(5) | H(40B)-C(40)-H(40C) | 109.5    |

|                     |          |                     |          |
|---------------------|----------|---------------------|----------|
| C(47)-C(41)-C(42)   | 114.7(3) | C(54)-C(48)-C(53)   | 110.5(7) |
| C(47)-C(41)-C(46)   | 125.2(3) | C(54)-C(48)-C(49)   | 129.5(7) |
| C(42)-C(41)-C(46)   | 120.0    | C(53)-C(48)-C(49)   | 120.0    |
| C(41)-C(42)-C(43)   | 120.0    | C(50)-C(49)-C(48)   | 120.0    |
| C(41)-C(42)-H(42A)  | 120.0    | C(50)-C(49)-H(49A)  | 120.0    |
| C(43)-C(42)-H(42A)  | 120.0    | C(48)-C(49)-H(49A)  | 120.0    |
| C(42)-C(43)-C(44)   | 120.0    | C(51)-C(50)-C(49)   | 120.0    |
| C(42)-C(43)-H(43A)  | 120.0    | C(51)-C(50)-H(50A)  | 120.0    |
| C(44)-C(43)-H(43A)  | 120.0    | C(49)-C(50)-H(50A)  | 120.0    |
| C(45)-C(44)-C(43)   | 120.0    | C(52)-C(51)-C(50)   | 120.0    |
| C(45)-C(44)-H(44A)  | 120.0    | C(52)-C(51)-H(51A)  | 120.0    |
| C(43)-C(44)-H(44A)  | 120.0    | C(50)-C(51)-H(51A)  | 120.0    |
| C(44)-C(45)-C(46)   | 120.0    | C(51)-C(52)-C(53)   | 120.0    |
| C(44)-C(45)-H(45A)  | 120.0    | C(51)-C(52)-H(52A)  | 120.0    |
| C(46)-C(45)-H(45A)  | 120.0    | C(53)-C(52)-H(52A)  | 120.0    |
| C(45)-C(46)-C(41)   | 120.0    | C(48)-C(53)-C(52)   | 120.0    |
| C(45)-C(46)-H(46A)  | 120.0    | C(48)-C(53)-H(53A)  | 120.0    |
| C(41)-C(46)-H(46A)  | 120.0    | C(52)-C(53)-H(53A)  | 120.0    |
| C(41)-C(47)-H(47A)  | 109.5    | C(48)-C(54)-H(54A)  | 109.5    |
| C(41)-C(47)-H(47B)  | 109.5    | C(48)-C(54)-H(54B)  | 109.5    |
| H(47A)-C(47)-H(47B) | 109.5    | H(54A)-C(54)-H(54B) | 109.5    |
| C(41)-C(47)-H(47C)  | 109.5    | C(48)-C(54)-H(54C)  | 109.5    |
| H(47A)-C(47)-H(47C) | 109.5    | H(54A)-C(54)-H(54C) | 109.5    |
| H(47B)-C(47)-H(47C) | 109.5    | H(54B)-C(54)-H(54C) | 109.5    |

---

Symmetry transformations used to generate equivalent atoms:

Table S3. Anisotropic displacement parameters ( $\text{\AA}^2 \times 10^3$ ) for  
 $[(\mu_2\text{-H})_8(\mu_2\text{-Cl})_2(\text{Cp}^*\text{Zr})_4] \cdot 2(\text{C}_7\text{H}_8)$ .

|       | U11     | U22    | U33    | U23    | U13    | U12    |
|-------|---------|--------|--------|--------|--------|--------|
| Zr(1) | 31(1)   | 31(1)  | 36(1)  | -3(1)  | -5(1)  | -2(1)  |
| Zr(2) | 30(1)   | 30(1)  | 31(1)  | -1(1)  | -2(1)  | 1(1)   |
| Zr(3) | 31(1)   | 30(1)  | 34(1)  | 2(1)   | -1(1)  | 1(1)   |
| Zr(4) | 30(1)   | 30(1)  | 33(1)  | 1(1)   | 1(1)   | -1(1)  |
| Cl(1) | 33(1)   | 39(1)  | 47(1)  | -7(1)  | -7(1)  | 4(1)   |
| Cl(2) | 33(1)   | 39(1)  | 44(1)  | 4(1)   | 3(1)   | 4(1)   |
| C(1)  | 37(3)   | 34(3)  | 46(3)  | -9(2)  | -12(2) | -2(2)  |
| C(2)  | 41(3)   | 44(3)  | 41(3)  | -8(2)  | -5(2)  | -11(2) |
| C(3)  | 55(3)   | 32(3)  | 58(3)  | -5(2)  | -31(3) | -2(2)  |
| C(4)  | 30(3)   | 51(3)  | 58(3)  | -22(3) | -15(2) | 4(2)   |
| C(5)  | 33(3)   | 43(3)  | 47(3)  | -9(2)  | -5(2)  | -10(2) |
| C(6)  | 62(4)   | 42(3)  | 75(4)  | -19(3) | -18(3) | 8(3)   |
| C(7)  | 67(4)   | 86(5)  | 58(4)  | -20(3) | 9(3)   | -27(4) |
| C(8)  | 112(6)  | 50(4)  | 91(5)  | 3(3)   | -63(4) | -1(4)  |
| C(9)  | 40(3)   | 76(5)  | 111(5) | -45(4) | -20(3) | 16(3)  |
| C(10) | 58(4)   | 81(5)  | 67(4)  | -6(3)  | 3(3)   | -35(3) |
| C(11) | 58(3)   | 30(3)  | 37(3)  | -3(2)  | -4(2)  | 3(2)   |
| C(12) | 48(3)   | 42(3)  | 44(3)  | -14(2) | -9(2)  | 13(2)  |
| C(13) | 41(3)   | 41(3)  | 35(2)  | -10(2) | 1(2)   | 1(2)   |
| C(14) | 41(3)   | 38(3)  | 33(2)  | -8(2)  | -5(2)  | 7(2)   |
| C(15) | 46(3)   | 38(3)  | 36(3)  | -9(2)  | 0(2)   | -4(2)  |
| C(16) | 136(6)  | 35(3)  | 54(4)  | 3(3)   | -4(4)  | 0(4)   |
| C(17) | 55(4)   | 75(4)  | 84(4)  | -27(4) | -24(3) | 27(3)  |
| C(18) | 58(4)   | 66(4)  | 65(4)  | -10(3) | 25(3)  | -1(3)  |
| C(19) | 70(4)   | 65(4)  | 38(3)  | -4(3)  | -11(3) | 13(3)  |
| C(20) | 55(3)   | 70(4)  | 68(4)  | -21(3) | -1(3)  | -18(3) |
| C(21) | 48(3)   | 52(3)  | 64(4)  | 26(3)  | -10(3) | -10(3) |
| C(22) | 56(3)   | 53(3)  | 38(3)  | 15(2)  | 14(2)  | 21(3)  |
| C(23) | 51(3)   | 42(3)  | 46(3)  | 15(2)  | -12(2) | -5(2)  |
| C(24) | 55(3)   | 48(3)  | 43(3)  | 20(3)  | 14(3)  | 18(3)  |
| C(25) | 85(4)   | 35(3)  | 42(3)  | 6(2)   | -9(3)  | 2(3)   |
| C(26) | 57(4)   | 131(7) | 131(7) | 75(6)  | -27(4) | -35(4) |
| C(27) | 156(7)  | 80(5)  | 51(4)  | 22(3)  | 42(4)  | 48(5)  |
| C(28) | 103(6)  | 81(5)  | 75(4)  | 22(4)  | -45(4) | -12(4) |
| C(29) | 80(5)   | 106(6) | 107(6) | 56(5)  | 37(4)  | 58(4)  |
| C(30) | 263(11) | 34(4)  | 75(5)  | -2(3)  | -52(6) | 2(5)   |
| C(31) | 35(3)   | 39(3)  | 40(3)  | 3(2)   | 4(2)   | -7(2)  |
| C(32) | 40(3)   | 44(3)  | 53(3)  | 16(2)  | 14(2)  | 7(2)   |
| C(33) | 52(3)   | 30(3)  | 45(3)  | 2(2)   | 17(3)  | -3(2)  |
| C(34) | 46(3)   | 47(3)  | 37(3)  | 7(2)   | -1(2)  | -9(2)  |
| C(35) | 29(2)   | 33(3)  | 47(3)  | 6(2)   | 2(2)   | -2(2)  |

|       |        |       |       |        |        |        |
|-------|--------|-------|-------|--------|--------|--------|
| C(36) | 48(3)  | 66(4) | 55(3) | -1(3)  | 1(3)   | -22(3) |
| C(37) | 40(3)  | 87(5) | 95(5) | 45(4)  | 23(3)  | 25(3)  |
| C(38) | 105(5) | 51(4) | 76(4) | -14(3) | 43(4)  | -9(4)  |
| C(39) | 73(4)  | 82(5) | 42(3) | 17(3)  | -11(3) | -33(3) |
| C(40) | 53(3)  | 37(3) | 75(4) | 12(3)  | 20(3)  | 5(2)   |

---

The anisotropic displacement factor exponent takes the form:  $-2p^2[ h^2 a^{*2}U^{11} + \dots + 2 h k a^* b^* U^{12} ]$

Table S4. Hydrogen coordinates ( $\times 10^4$ ) and isotropic displacement parameters ( $\text{\AA}^2 \times 10^3$ ) for  $[(\mu_2\text{-H})_8(\mu_2\text{-Cl})_2(\text{Cp}^*\text{Zr})_4] \cdot 2(\text{C}_7\text{H}_8)$ .

|        | x     | y     | z     | U(eq) |
|--------|-------|-------|-------|-------|
| H(6A)  | 2200  | 11775 | 7116  | 89    |
| H(6B)  | 1182  | 11270 | 7040  | 89    |
| H(6C)  | 1569  | 11475 | 7573  | 89    |
| H(7A)  | 1549  | 13014 | 6189  | 105   |
| H(7B)  | 2406  | 12792 | 6564  | 105   |
| H(7C)  | 2172  | 13795 | 6428  | 105   |
| H(8A)  | -91   | 15181 | 6859  | 127   |
| H(8B)  | -136  | 14577 | 6387  | 127   |
| H(8C)  | 889   | 14974 | 6564  | 127   |
| H(9A)  | -982  | 14337 | 7862  | 114   |
| H(9B)  | -1642 | 13673 | 7552  | 114   |
| H(9C)  | -1282 | 14583 | 7320  | 114   |
| H(10A) | -763  | 11785 | 7697  | 103   |
| H(10B) | -744  | 12551 | 8094  | 103   |
| H(10C) | 152   | 11875 | 8055  | 103   |
| H(16A) | 2280  | 18398 | 8592  | 112   |
| H(16B) | 1916  | 17730 | 8183  | 112   |
| H(16C) | 3061  | 17833 | 8293  | 112   |
| H(17A) | 362   | 17080 | 8510  | 107   |
| H(17B) | 314   | 17658 | 8992  | 107   |
| H(17C) | -68   | 16661 | 8995  | 107   |
| H(18A) | 710   | 16142 | 9951  | 94    |
| H(18B) | 1236  | 15211 | 9873  | 94    |
| H(18C) | 377   | 15515 | 9517  | 94    |
| H(19A) | 2926  | 15225 | 9957  | 87    |
| H(19B) | 3481  | 16133 | 10064 | 87    |
| H(19C) | 3921  | 15454 | 9679  | 87    |
| H(20A) | 4629  | 16478 | 9076  | 96    |
| H(20B) | 4361  | 17419 | 9300  | 96    |
| H(20C) | 4334  | 17278 | 8728  | 96    |
| H(26A) | 661   | 11780 | 9443  | 160   |
| H(26B) | 785   | 11436 | 8901  | 160   |
| H(26C) | 484   | 12439 | 9001  | 160   |
| H(27A) | 1792  | 12879 | 10144 | 143   |
| H(27B) | 1158  | 13395 | 9749  | 143   |
| H(27C) | 2158  | 13813 | 9946  | 143   |
| H(28A) | 4694  | 13499 | 9489  | 130   |
| H(28B) | 4510  | 12799 | 9911  | 130   |
| H(28C) | 3895  | 13697 | 9898  | 130   |
| H(29A) | 4593  | 11463 | 8593  | 147   |
| H(29B) | 4939  | 11513 | 9144  | 147   |



|        |      |       |       |     |
|--------|------|-------|-------|-----|
| H(29C) | 5060 | 12353 | 8800  | 147 |
| H(30A) | 2806 | 10495 | 8657  | 186 |
| H(30B) | 3063 | 11156 | 8226  | 186 |
| H(30C) | 1948 | 11012 | 8384  | 186 |
| H(36A) | 5865 | 16966 | 7612  | 85  |
| H(36B) | 5719 | 16273 | 8041  | 85  |
| H(36C) | 4920 | 17027 | 7952  | 85  |
| H(37A) | 6018 | 14045 | 7377  | 111 |
| H(37B) | 6173 | 14753 | 7798  | 111 |
| H(37C) | 6641 | 14920 | 7277  | 111 |
| H(38A) | 4735 | 13538 | 6843  | 116 |
| H(38B) | 5233 | 14112 | 6426  | 116 |
| H(38C) | 4075 | 13946 | 6421  | 116 |
| H(39A) | 3357 | 15752 | 6141  | 99  |
| H(39B) | 2537 | 16032 | 6524  | 99  |
| H(39C) | 2717 | 15012 | 6406  | 99  |
| H(40A) | 2790 | 17046 | 7066  | 83  |
| H(40B) | 3813 | 17532 | 6975  | 83  |
| H(40C) | 3445 | 17356 | 7514  | 83  |
| H(42A) | 1006 | 15384 | 11008 | 128 |
| H(43A) | 1684 | 13957 | 11021 | 193 |
| H(44A) | 3389 | 13772 | 11097 | 141 |
| H(45A) | 4416 | 15013 | 11160 | 148 |
| H(46A) | 3739 | 16439 | 11147 | 108 |
| H(47A) | 1117 | 16758 | 11026 | 246 |
| H(47B) | 2048 | 17175 | 10760 | 246 |
| H(47C) | 1972 | 17207 | 11336 | 246 |
| H(49A) | 1377 | 10761 | 10230 | 401 |
| H(50A) | 459  | 9455  | 10149 | 401 |
| H(51A) | 1233 | 8143  | 9904  | 353 |
| H(52A) | 2924 | 8136  | 9740  | 306 |
| H(53A) | 3842 | 9441  | 9820  | 355 |
| H(54A) | 3026 | 11434 | 10165 | 464 |
| H(54B) | 3671 | 10983 | 9751  | 464 |
| H(54C) | 3861 | 10738 | 10305 | 464 |

---

Table S5. Atomic coordinates ( $\times 10^4$ ) and equivalent isotropic displacement parameters ( $\text{\AA}^2 \times 10^3$ ) for  $[(\mu_2\text{-H})_6(\text{Cp}^*\text{Zr})_4]$

|       | x         | y         | z        | U(eq)   |
|-------|-----------|-----------|----------|---------|
| Zr(1) | 7618(1)   | 6795(1)   | 1806(1)  | 24(1)   |
| Zr(2) | 6900(1)   | 9474(1)   | 2319(1)  | 23(1)   |
| Zr(3) | 7318(1)   | 7138(1)   | 3416(1)  | 25(1)   |
| Zr(4) | 4896(1)   | 8264(1)   | 2565(1)  | 25(1)   |
| C(1)  | 8900(12)  | 4591(10)  | 1389(6)  | 48(3)   |
| C(2)  | 9691(11)  | 5262(12)  | 1224(7)  | 50(3)   |
| C(3)  | 9132(15)  | 6234(12)  | 682(7)   | 61(4)   |
| C(4)  | 7973(14)  | 6163(11)  | 547(6)   | 54(3)   |
| C(5)  | 7856(11)  | 5119(11)  | 979(6)   | 45(3)   |
| C(6)  | 9170(20)  | 3393(11)  | 1906(8)  | 113(7)  |
| C(7)  | 10974(15) | 4930(20)  | 1509(11) | 160(11) |
| C(8)  | 9740(20)  | 7120(16)  | 284(10)  | 139(10) |
| C(9)  | 7060(20)  | 7044(16)  | 4(7)     | 143(10) |
| C(10) | 6835(14)  | 4635(16)  | 956(11)  | 123(8)  |
| C(11) | 6041(10)  | 11881(9)  | 1981(7)  | 40(3)   |
| C(12) | 6993(13)  | 11248(10) | 1434(6)  | 48(3)   |
| C(13) | 8178(11)  | 10695(10) | 1706(7)  | 47(3)   |
| C(14) | 8004(11)  | 10908(10) | 2439(7)  | 44(3)   |
| C(15) | 6670(11)  | 11643(9)  | 2605(6)  | 39(3)   |
| C(16) | 4614(14)  | 12710(12) | 1893(10) | 99(6)   |
| C(17) | 6710(20)  | 11358(15) | 656(7)   | 105(7)  |
| C(18) | 9516(14)  | 10035(13) | 1270(10) | 102(7)  |
| C(19) | 9120(15)  | 10500(13) | 2927(9)  | 99(7)   |
| C(20) | 6028(17)  | 12192(13) | 3323(7)  | 85(5)   |
| C(21) | 9090(11)  | 5521(12)  | 4128(6)  | 47(3)   |
| C(22) | 8755(13)  | 6751(12)  | 4388(6)  | 50(3)   |
| C(23) | 7483(12)  | 7181(11)  | 4717(5)  | 44(3)   |
| C(24) | 7010(12)  | 6238(12)  | 4673(5)  | 45(3)   |
| C(25) | 7990(11)  | 5240(10)  | 4313(5)  | 39(3)   |
| C(26) | 10424(13) | 4666(14)  | 3785(7)  | 86(5)   |
| C(27) | 9656(17)  | 7434(17)  | 4360(9)  | 110(7)  |
| C(28) | 6706(18)  | 8442(13)  | 5094(7)  | 98(6)   |
| C(29) | 5682(14)  | 6267(14)  | 5002(7)  | 74(4)   |
| C(30) | 7892(15)  | 3999(12)  | 4168(7)  | 73(4)   |
| C(31) | 2578(9)   | 9784(10)  | 2762(6)  | 36(2)   |
| C(32) | 2692(10)  | 8657(11)  | 3215(6)  | 41(3)   |
| C(33) | 3000(11)  | 7649(10)  | 2783(7)  | 45(3)   |
| C(34) | 3031(10)  | 8118(11)  | 2047(6)  | 43(3)   |
| C(35) | 2785(10)  | 9436(10)  | 2042(6)  | 38(3)   |
| C(36) | 2159(11)  | 11107(10) | 3015(7)  | 52(3)   |
| C(37) | 2453(13)  | 8617(15)  | 4030(6)  | 75(4)   |

|       |          |           |          |       |
|-------|----------|-----------|----------|-------|
| C(38) | 3212(14) | 6254(13)  | 3036(9)  | 81(5) |
| C(39) | 3221(13) | 7375(15)  | 1401(7)  | 75(4) |
| C(40) | 2686(11) | 10343(12) | 1381(6)  | 58(4) |
| H(1)  | 7630(80) | 8450(80)  | 1540(40) | 30    |
| H(2)  | 8430(80) | 5770(80)  | 2670(40) | 30    |
| H(3)  | 5760(80) | 7460(80)  | 1710(40) | 30    |
| H(4)  | 7500(80) | 8990(80)  | 3430(40) | 30    |
| H(5)  | 5090(80) | 9920(80)  | 2360(40) | 30    |
| H(6)  | 5290(80) | 7240(80)  | 3680(40) | 30    |

---

$U(\text{eq})$  is defined as one third of the trace of the orthogonalized  $U^{\text{ij}}$  tensor.

Table S6. Bond lengths [Å] and angles [°] for  $[(\mu_2\text{-H})_6(\text{Cp}^*\text{Zr})_4]$

|             |            |              |           |
|-------------|------------|--------------|-----------|
| Zr(1)-C(2)  | 2.472(11)  | C(3)-C(8)    | 1.521(17) |
| Zr(1)-C(1)  | 2.484(10)  | C(4)-C(5)    | 1.401(16) |
| Zr(1)-C(4)  | 2.488(10)  | C(4)-C(9)    | 1.516(17) |
| Zr(1)-C(3)  | 2.497(10)  | C(5)-C(10)   | 1.485(16) |
| Zr(1)-C(5)  | 2.516(10)  | C(6)-H(6A)   | 0.9800    |
| Zr(1)-Zr(3) | 3.0525(13) | C(6)-H(6B)   | 0.9800    |
| Zr(1)-Zr(2) | 3.0603(12) | C(6)-H(6C)   | 0.9800    |
| Zr(1)-Zr(4) | 3.0694(13) | C(7)-H(7A)   | 0.9800    |
| Zr(1)-H(1)  | 1.90(8)    | C(7)-H(7B)   | 0.9800    |
| Zr(1)-H(2)  | 1.98(8)    | C(7)-H(7C)   | 0.9800    |
| Zr(1)-H(3)  | 1.95(8)    | C(8)-H(8A)   | 0.9800    |
| Zr(2)-C(12) | 2.487(10)  | C(8)-H(8B)   | 0.9800    |
| Zr(2)-C(14) | 2.488(9)   | C(8)-H(8C)   | 0.9800    |
| Zr(2)-C(13) | 2.493(10)  | C(9)-H(9A)   | 0.9800    |
| Zr(2)-C(15) | 2.498(9)   | C(9)-H(9B)   | 0.9800    |
| Zr(2)-C(11) | 2.532(9)   | C(9)-H(9C)   | 0.9800    |
| Zr(2)-Zr(3) | 3.0737(12) | C(10)-H(10A) | 0.9800    |
| Zr(2)-Zr(4) | 3.0774(12) | C(10)-H(10B) | 0.9800    |
| Zr(2)-H(1)  | 1.87(8)    | C(10)-H(10C) | 0.9800    |
| Zr(2)-H(4)  | 2.21(8)    | C(11)-C(15)  | 1.396(15) |
| Zr(2)-H(5)  | 1.89(8)    | C(11)-C(12)  | 1.404(16) |
| Zr(3)-C(23) | 2.486(10)  | C(11)-C(16)  | 1.516(16) |
| Zr(3)-C(25) | 2.489(9)   | C(12)-C(13)  | 1.368(16) |
| Zr(3)-C(22) | 2.493(10)  | C(12)-C(17)  | 1.519(16) |
| Zr(3)-C(24) | 2.497(10)  | C(13)-C(14)  | 1.401(16) |
| Zr(3)-C(21) | 2.506(10)  | C(13)-C(18)  | 1.547(16) |
| Zr(3)-Zr(4) | 3.0864(13) | C(14)-C(15)  | 1.402(15) |
| Zr(3)-H(2)  | 2.10(8)    | C(14)-C(19)  | 1.545(14) |
| Zr(3)-H(4)  | 2.21(8)    | C(15)-C(20)  | 1.515(15) |
| Zr(3)-H(6)  | 2.24(8)    | C(16)-H(16A) | 0.9800    |
| Zr(4)-C(31) | 2.478(10)  | C(16)-H(16B) | 0.9800    |
| Zr(4)-C(35) | 2.479(9)   | C(16)-H(16C) | 0.9800    |
| Zr(4)-C(33) | 2.499(10)  | C(17)-H(17A) | 0.9800    |
| Zr(4)-C(32) | 2.510(10)  | C(17)-H(17B) | 0.9800    |
| Zr(4)-C(34) | 2.522(10)  | C(17)-H(17C) | 0.9800    |
| Zr(4)-H(3)  | 1.88(8)    | C(18)-H(18A) | 0.9800    |
| Zr(4)-H(5)  | 1.98(8)    | C(18)-H(18B) | 0.9800    |
| Zr(4)-H(6)  | 2.28(8)    | C(18)-H(18C) | 0.9800    |
| C(1)-C(5)   | 1.379(15)  | C(19)-H(19A) | 0.9800    |
| C(1)-C(2)   | 1.389(16)  | C(19)-H(19B) | 0.9800    |
| C(1)-C(6)   | 1.521(16)  | C(19)-H(19C) | 0.9800    |
| C(2)-C(3)   | 1.408(18)  | C(20)-H(20A) | 0.9800    |
| C(2)-C(7)   | 1.503(19)  | C(20)-H(20B) | 0.9800    |
| C(3)-C(4)   | 1.409(18)  | C(20)-H(20C) | 0.9800    |

|                  |           |                   |           |
|------------------|-----------|-------------------|-----------|
| C(21)-C(25)      | 1.404(15) | C(31)-C(35)       | 1.417(14) |
| C(21)-C(22)      | 1.423(16) | C(31)-C(32)       | 1.421(14) |
| C(21)-C(26)      | 1.520(16) | C(31)-C(36)       | 1.498(14) |
| C(22)-C(23)      | 1.393(16) | C(32)-C(33)       | 1.386(15) |
| C(22)-C(27)      | 1.516(16) | C(32)-C(37)       | 1.517(15) |
| C(23)-C(24)      | 1.403(15) | C(33)-C(34)       | 1.422(15) |
| C(23)-C(28)      | 1.540(16) | C(33)-C(38)       | 1.531(15) |
| C(24)-C(25)      | 1.383(15) | C(34)-C(35)       | 1.410(14) |
| C(24)-C(29)      | 1.537(17) | C(34)-C(39)       | 1.507(16) |
| C(25)-C(30)      | 1.527(15) | C(35)-C(40)       | 1.501(14) |
| C(26)-H(26A)     | 0.9800    | C(36)-H(36A)      | 0.9800    |
| C(26)-H(26B)     | 0.9800    | C(36)-H(36B)      | 0.9800    |
| C(26)-H(26C)     | 0.9800    | C(36)-H(36C)      | 0.9800    |
| C(27)-H(27A)     | 0.9800    | C(37)-H(37A)      | 0.9800    |
| C(27)-H(27B)     | 0.9800    | C(37)-H(37B)      | 0.9800    |
| C(27)-H(27C)     | 0.9800    | C(37)-H(37C)      | 0.9800    |
| C(28)-H(28A)     | 0.9800    | C(38)-H(38A)      | 0.9800    |
| C(28)-H(28B)     | 0.9800    | C(38)-H(38B)      | 0.9800    |
| C(28)-H(28C)     | 0.9800    | C(38)-H(38C)      | 0.9800    |
| C(29)-H(29A)     | 0.9800    | C(39)-H(39A)      | 0.9800    |
| C(29)-H(29B)     | 0.9800    | C(39)-H(39B)      | 0.9800    |
| C(29)-H(29C)     | 0.9800    | C(39)-H(39C)      | 0.9800    |
| C(30)-H(30A)     | 0.9800    | C(40)-H(40A)      | 0.9800    |
| C(30)-H(30B)     | 0.9800    | C(40)-H(40B)      | 0.9800    |
| C(30)-H(30C)     | 0.9800    | C(40)-H(40C)      | 0.9800    |
|                  |           |                   |           |
| C(2)-Zr(1)-C(1)  | 32.6(4)   | Zr(3)-Zr(1)-Zr(2) | 60.37(3)  |
| C(2)-Zr(1)-C(4)  | 54.5(4)   | C(2)-Zr(1)-Zr(4)  | 169.2(3)  |
| C(1)-Zr(1)-C(4)  | 53.5(4)   | C(1)-Zr(1)-Zr(4)  | 136.6(3)  |
| C(2)-Zr(1)-C(3)  | 32.9(4)   | C(4)-Zr(1)-Zr(4)  | 122.8(3)  |
| C(1)-Zr(1)-C(3)  | 53.7(4)   | C(3)-Zr(1)-Zr(4)  | 150.4(4)  |
| C(4)-Zr(1)-C(3)  | 32.8(4)   | C(5)-Zr(1)-Zr(4)  | 117.2(3)  |
| C(2)-Zr(1)-C(5)  | 54.1(4)   | Zr(3)-Zr(1)-Zr(4) | 60.55(3)  |
| C(1)-Zr(1)-C(5)  | 32.0(4)   | Zr(2)-Zr(1)-Zr(4) | 60.27(3)  |
| C(4)-Zr(1)-C(5)  | 32.5(4)   | C(2)-Zr(1)-H(1)   | 105(3)    |
| C(3)-Zr(1)-C(5)  | 54.0(4)   | C(1)-Zr(1)-H(1)   | 135(3)    |
| C(2)-Zr(1)-Zr(3) | 120.5(3)  | C(4)-Zr(1)-H(1)   | 95(2)     |
| C(1)-Zr(1)-Zr(3) | 118.2(3)  | C(3)-Zr(1)-H(1)   | 82(2)     |
| C(4)-Zr(1)-Zr(3) | 171.4(3)  | C(5)-Zr(1)-H(1)   | 127(2)    |
| C(3)-Zr(1)-Zr(3) | 146.8(4)  | Zr(3)-Zr(1)-H(1)  | 94(2)     |
| C(5)-Zr(1)-Zr(3) | 139.3(3)  | Zr(2)-Zr(1)-H(1)  | 35(2)     |
| C(2)-Zr(1)-Zr(2) | 130.4(3)  | Zr(4)-Zr(1)-H(1)  | 86(3)     |
| C(1)-Zr(1)-Zr(2) | 161.9(3)  | C(2)-Zr(1)-H(2)   | 80(2)     |
| C(4)-Zr(1)-Zr(2) | 128.2(3)  | C(1)-Zr(1)-H(2)   | 76(2)     |
| C(3)-Zr(1)-Zr(2) | 116.3(2)  | C(4)-Zr(1)-H(2)   | 129(2)    |
| C(5)-Zr(1)-Zr(2) | 158.6(3)  | C(3)-Zr(1)-H(2)   | 113(2)    |

|                   |          |                   |          |
|-------------------|----------|-------------------|----------|
| C(5)-Zr(1)-H(2)   | 104(2)   | C(15)-Zr(2)-H(1)  | 135(3)   |
| Zr(3)-Zr(1)-H(2)  | 43(2)    | C(11)-Zr(2)-H(1)  | 114(3)   |
| Zr(2)-Zr(1)-H(2)  | 97(2)    | Zr(1)-Zr(2)-H(1)  | 36(3)    |
| Zr(4)-Zr(1)-H(2)  | 97(2)    | Zr(3)-Zr(2)-H(1)  | 94(3)    |
| H(1)-Zr(1)-H(2)   | 121(3)   | Zr(4)-Zr(2)-H(1)  | 86(3)    |
| C(2)-Zr(1)-H(3)   | 139(2)   | C(12)-Zr(2)-H(4)  | 129(2)   |
| C(1)-Zr(1)-H(3)   | 114(2)   | C(14)-Zr(2)-H(4)  | 76(2)    |
| C(4)-Zr(1)-H(3)   | 87(2)    | C(13)-Zr(2)-H(4)  | 105(2)   |
| C(3)-Zr(1)-H(3)   | 118(2)   | C(15)-Zr(2)-H(4)  | 81(2)    |
| C(5)-Zr(1)-H(3)   | 86(2)    | C(11)-Zr(2)-H(4)  | 112(2)   |
| Zr(3)-Zr(1)-H(3)  | 95(2)    | Zr(1)-Zr(2)-H(4)  | 102(2)   |
| Zr(2)-Zr(1)-H(3)  | 83(2)    | Zr(3)-Zr(2)-H(4)  | 46(2)    |
| Zr(4)-Zr(1)-H(3)  | 36(2)    | Zr(4)-Zr(2)-H(4)  | 96(2)    |
| H(1)-Zr(1)-H(3)   | 91(4)    | H(1)-Zr(2)-H(4)   | 127(3)   |
| H(2)-Zr(1)-H(3)   | 123(3)   | C(12)-Zr(2)-H(5)  | 98(3)    |
| C(12)-Zr(2)-C(14) | 53.9(4)  | C(14)-Zr(2)-H(5)  | 128(3)   |
| C(12)-Zr(2)-C(13) | 31.9(4)  | C(13)-Zr(2)-H(5)  | 129(3)   |
| C(14)-Zr(2)-C(13) | 32.7(4)  | C(15)-Zr(2)-H(5)  | 95(3)    |
| C(12)-Zr(2)-C(15) | 53.7(4)  | C(11)-Zr(2)-H(5)  | 79(3)    |
| C(14)-Zr(2)-C(15) | 32.7(4)  | Zr(1)-Zr(2)-H(5)  | 93(3)    |
| C(13)-Zr(2)-C(15) | 53.6(3)  | Zr(3)-Zr(2)-H(5)  | 93(3)    |
| C(12)-Zr(2)-C(11) | 32.5(4)  | Zr(4)-Zr(2)-H(5)  | 38(3)    |
| C(14)-Zr(2)-C(11) | 53.8(3)  | H(1)-Zr(2)-H(5)   | 105(4)   |
| C(13)-Zr(2)-C(11) | 53.2(4)  | H(4)-Zr(2)-H(5)   | 109(3)   |
| C(15)-Zr(2)-C(11) | 32.2(3)  | C(23)-Zr(3)-C(25) | 53.6(4)  |
| C(12)-Zr(2)-Zr(1) | 119.6(3) | C(23)-Zr(3)-C(22) | 32.5(4)  |
| C(14)-Zr(2)-Zr(1) | 138.1(3) | C(25)-Zr(3)-C(22) | 53.9(4)  |
| C(13)-Zr(2)-Zr(1) | 116.5(2) | C(23)-Zr(3)-C(24) | 32.7(4)  |
| C(15)-Zr(2)-Zr(1) | 169.9(2) | C(25)-Zr(3)-C(24) | 32.2(4)  |
| C(11)-Zr(2)-Zr(1) | 146.1(3) | C(22)-Zr(3)-C(24) | 54.1(4)  |
| C(12)-Zr(2)-Zr(3) | 169.6(3) | C(23)-Zr(3)-C(21) | 54.4(4)  |
| C(14)-Zr(2)-Zr(3) | 118.7(3) | C(25)-Zr(3)-C(21) | 32.6(3)  |
| C(13)-Zr(2)-Zr(3) | 137.8(3) | C(22)-Zr(3)-C(21) | 33.1(4)  |
| C(15)-Zr(2)-Zr(3) | 125.2(3) | C(24)-Zr(3)-C(21) | 54.3(4)  |
| C(11)-Zr(2)-Zr(3) | 152.2(3) | C(23)-Zr(3)-Zr(1) | 170.1(3) |
| Zr(1)-Zr(2)-Zr(3) | 59.69(3) | C(25)-Zr(3)-Zr(1) | 121.3(3) |
| C(12)-Zr(2)-Zr(4) | 129.5(3) | C(22)-Zr(3)-Zr(1) | 137.9(3) |
| C(14)-Zr(2)-Zr(4) | 160.7(3) | C(24)-Zr(3)-Zr(1) | 147.5(3) |
| C(13)-Zr(2)-Zr(4) | 159.6(3) | C(21)-Zr(3)-Zr(1) | 116.4(3) |
| C(15)-Zr(2)-Zr(4) | 129.8(3) | C(23)-Zr(3)-Zr(2) | 123.6(3) |
| C(11)-Zr(2)-Zr(4) | 116.9(2) | C(25)-Zr(3)-Zr(2) | 171.3(3) |
| Zr(1)-Zr(2)-Zr(4) | 60.01(3) | C(22)-Zr(3)-Zr(2) | 118.8(3) |
| Zr(3)-Zr(2)-Zr(4) | 60.23(3) | C(24)-Zr(3)-Zr(2) | 150.1(3) |
| C(12)-Zr(2)-H(1)  | 84(3)    | C(21)-Zr(3)-Zr(2) | 138.7(3) |
| C(14)-Zr(2)-H(1)  | 113(3)   | Zr(1)-Zr(3)-Zr(2) | 59.94(3) |
| C(13)-Zr(2)-H(1)  | 84(3)    | C(23)-Zr(3)-Zr(4) | 129.8(3) |

|                   |          |                   |           |
|-------------------|----------|-------------------|-----------|
| C(25)-Zr(3)-Zr(4) | 128.6(3) | C(32)-Zr(4)-Zr(1) | 159.2(3)  |
| C(22)-Zr(3)-Zr(4) | 160.9(3) | C(34)-Zr(4)-Zr(1) | 115.8(3)  |
| C(24)-Zr(3)-Zr(4) | 116.1(3) | C(31)-Zr(4)-Zr(2) | 116.3(2)  |
| C(21)-Zr(3)-Zr(4) | 159.0(3) | C(35)-Zr(4)-Zr(2) | 118.7(2)  |
| Zr(1)-Zr(3)-Zr(4) | 60.00(3) | C(33)-Zr(4)-Zr(2) | 170.7(3)  |
| Zr(2)-Zr(3)-Zr(4) | 59.94(3) | C(32)-Zr(4)-Zr(2) | 140.1(3)  |
| C(23)-Zr(3)-H(2)  | 131(2)   | C(34)-Zr(4)-Zr(2) | 144.3(3)  |
| C(25)-Zr(3)-H(2)  | 84(2)    | Zr(1)-Zr(4)-Zr(2) | 59.72(3)  |
| C(22)-Zr(3)-H(2)  | 105(2)   | C(31)-Zr(4)-Zr(3) | 137.3(2)  |
| C(24)-Zr(3)-H(2)  | 115(2)   | C(35)-Zr(4)-Zr(3) | 170.2(3)  |
| C(21)-Zr(3)-H(2)  | 77(2)    | C(33)-Zr(4)-Zr(3) | 126.0(3)  |
| Zr(1)-Zr(3)-H(2)  | 40(2)    | C(32)-Zr(4)-Zr(3) | 119.6(3)  |
| Zr(2)-Zr(3)-H(2)  | 94(2)    | C(34)-Zr(4)-Zr(3) | 153.0(3)  |
| Zr(4)-Zr(3)-H(2)  | 94(2)    | Zr(1)-Zr(4)-Zr(3) | 59.45(3)  |
| C(23)-Zr(3)-H(4)  | 79(2)    | Zr(2)-Zr(4)-Zr(3) | 59.82(3)  |
| C(25)-Zr(3)-H(4)  | 128(2)   | C(31)-Zr(4)-H(3)  | 127(3)    |
| C(22)-Zr(3)-H(4)  | 76(2)    | C(35)-Zr(4)-H(3)  | 94(3)     |
| C(24)-Zr(3)-H(4)  | 110(2)   | C(33)-Zr(4)-H(3)  | 102(3)    |
| C(21)-Zr(3)-H(4)  | 105(2)   | C(32)-Zr(4)-H(3)  | 132(3)    |
| Zr(1)-Zr(3)-H(4)  | 102(2)   | C(34)-Zr(4)-H(3)  | 80(3)     |
| Zr(2)-Zr(3)-H(4)  | 46(2)    | Zr(1)-Zr(4)-H(3)  | 37(3)     |
| Zr(4)-Zr(3)-H(4)  | 96(2)    | Zr(2)-Zr(4)-H(3)  | 84(3)     |
| H(2)-Zr(3)-H(4)   | 123(3)   | Zr(3)-Zr(4)-H(3)  | 96(3)     |
| C(23)-Zr(3)-H(6)  | 90(2)    | C(31)-Zr(4)-H(5)  | 81(2)     |
| C(25)-Zr(3)-H(6)  | 86(2)    | C(35)-Zr(4)-H(5)  | 85(2)     |
| C(22)-Zr(3)-H(6)  | 121(2)   | C(33)-Zr(4)-H(5)  | 135(2)    |
| C(24)-Zr(3)-H(6)  | 69(2)    | C(32)-Zr(4)-H(5)  | 110(2)    |
| C(21)-Zr(3)-H(6)  | 118(2)   | C(34)-Zr(4)-H(5)  | 116(2)    |
| Zr(1)-Zr(3)-H(6)  | 99(2)    | Zr(1)-Zr(4)-H(5)  | 91(2)     |
| Zr(2)-Zr(3)-H(6)  | 102(2)   | Zr(2)-Zr(4)-H(5)  | 36(2)     |
| Zr(4)-Zr(3)-H(6)  | 48(2)    | Zr(3)-Zr(4)-H(5)  | 91(2)     |
| H(2)-Zr(3)-H(6)   | 112(3)   | H(3)-Zr(4)-H(5)   | 100(3)    |
| H(4)-Zr(3)-H(6)   | 115(3)   | C(31)-Zr(4)-H(6)  | 102(2)    |
| C(31)-Zr(4)-C(35) | 33.2(3)  | C(35)-Zr(4)-H(6)  | 129(2)    |
| C(31)-Zr(4)-C(33) | 54.4(3)  | C(33)-Zr(4)-H(6)  | 82(2)     |
| C(35)-Zr(4)-C(33) | 54.2(4)  | C(32)-Zr(4)-H(6)  | 75(2)     |
| C(31)-Zr(4)-C(32) | 33.1(3)  | C(34)-Zr(4)-H(6)  | 114(2)    |
| C(35)-Zr(4)-C(32) | 54.4(4)  | Zr(1)-Zr(4)-H(6)  | 97(2)     |
| C(33)-Zr(4)-C(32) | 32.1(3)  | Zr(2)-Zr(4)-H(6)  | 101(2)    |
| C(31)-Zr(4)-C(34) | 54.8(3)  | Zr(3)-Zr(4)-H(6)  | 46(2)     |
| C(35)-Zr(4)-C(34) | 32.7(3)  | H(3)-Zr(4)-H(6)   | 123(3)    |
| C(33)-Zr(4)-C(34) | 32.9(4)  | H(5)-Zr(4)-H(6)   | 118(3)    |
| C(32)-Zr(4)-C(34) | 54.1(4)  | C(5)-C(1)-C(2)    | 110.0(10) |
| C(31)-Zr(4)-Zr(1) | 160.8(2) | C(5)-C(1)-C(6)    | 124.2(13) |
| C(35)-Zr(4)-Zr(1) | 129.3(3) | C(2)-C(1)-C(6)    | 125.7(13) |
| C(33)-Zr(4)-Zr(1) | 128.9(3) | C(5)-C(1)-Zr(1)   | 75.3(6)   |

|                  |           |                     |           |
|------------------|-----------|---------------------|-----------|
| C(2)-C(1)-Zr(1)  | 73.2(6)   | H(9A)-C(9)-H(9B)    | 109.5     |
| C(6)-C(1)-Zr(1)  | 121.3(8)  | C(4)-C(9)-H(9C)     | 109.5     |
| C(1)-C(2)-C(3)   | 107.0(10) | H(9A)-C(9)-H(9C)    | 109.5     |
| C(1)-C(2)-C(7)   | 126.6(16) | H(9B)-C(9)-H(9C)    | 109.5     |
| C(3)-C(2)-C(7)   | 126.1(15) | C(5)-C(10)-H(10A)   | 109.5     |
| C(1)-C(2)-Zr(1)  | 74.2(6)   | C(5)-C(10)-H(10B)   | 109.5     |
| C(3)-C(2)-Zr(1)  | 74.5(6)   | H(10A)-C(10)-H(10B) | 109.5     |
| C(7)-C(2)-Zr(1)  | 121.8(8)  | C(5)-C(10)-H(10C)   | 109.5     |
| C(2)-C(3)-C(4)   | 107.5(9)  | H(10A)-C(10)-H(10C) | 109.5     |
| C(2)-C(3)-C(8)   | 125.3(16) | H(10B)-C(10)-H(10C) | 109.5     |
| C(4)-C(3)-C(8)   | 127.1(16) | C(15)-C(11)-C(12)   | 107.0(9)  |
| C(2)-C(3)-Zr(1)  | 72.6(6)   | C(15)-C(11)-C(16)   | 127.1(12) |
| C(4)-C(3)-Zr(1)  | 73.2(6)   | C(12)-C(11)-C(16)   | 125.8(12) |
| C(8)-C(3)-Zr(1)  | 123.1(8)  | C(15)-C(11)-Zr(2)   | 72.6(5)   |
| C(5)-C(4)-C(3)   | 108.1(10) | C(12)-C(11)-Zr(2)   | 72.0(6)   |
| C(5)-C(4)-C(9)   | 127.0(15) | C(16)-C(11)-Zr(2)   | 122.7(7)  |
| C(3)-C(4)-C(9)   | 124.8(15) | C(13)-C(12)-C(11)   | 108.6(10) |
| C(5)-C(4)-Zr(1)  | 74.9(6)   | C(13)-C(12)-C(17)   | 128.0(14) |
| C(3)-C(4)-Zr(1)  | 73.9(6)   | C(11)-C(12)-C(17)   | 123.0(13) |
| C(9)-C(4)-Zr(1)  | 119.1(8)  | C(13)-C(12)-Zr(2)   | 74.3(6)   |
| C(1)-C(5)-C(4)   | 107.3(10) | C(11)-C(12)-Zr(2)   | 75.5(6)   |
| C(1)-C(5)-C(10)  | 127.1(13) | C(17)-C(12)-Zr(2)   | 122.8(8)  |
| C(4)-C(5)-C(10)  | 125.5(14) | C(12)-C(13)-C(14)   | 109.0(10) |
| C(1)-C(5)-Zr(1)  | 72.7(6)   | C(12)-C(13)-C(18)   | 126.0(13) |
| C(4)-C(5)-Zr(1)  | 72.6(6)   | C(14)-C(13)-C(18)   | 124.8(13) |
| C(10)-C(5)-Zr(1) | 123.1(8)  | C(12)-C(13)-Zr(2)   | 73.8(6)   |
| C(1)-C(6)-H(6A)  | 109.5     | C(14)-C(13)-Zr(2)   | 73.4(6)   |
| C(1)-C(6)-H(6B)  | 109.5     | C(18)-C(13)-Zr(2)   | 122.7(7)  |
| H(6A)-C(6)-H(6B) | 109.5     | C(13)-C(14)-C(15)   | 106.7(10) |
| C(1)-C(6)-H(6C)  | 109.5     | C(13)-C(14)-C(19)   | 124.7(13) |
| H(6A)-C(6)-H(6C) | 109.5     | C(15)-C(14)-C(19)   | 128.3(13) |
| H(6B)-C(6)-H(6C) | 109.5     | C(13)-C(14)-Zr(2)   | 73.9(6)   |
| C(2)-C(7)-H(7A)  | 109.5     | C(15)-C(14)-Zr(2)   | 74.1(5)   |
| C(2)-C(7)-H(7B)  | 109.5     | C(19)-C(14)-Zr(2)   | 121.8(7)  |
| H(7A)-C(7)-H(7B) | 109.5     | C(11)-C(15)-C(14)   | 108.6(9)  |
| C(2)-C(7)-H(7C)  | 109.5     | C(11)-C(15)-C(20)   | 125.3(12) |
| H(7A)-C(7)-H(7C) | 109.5     | C(14)-C(15)-C(20)   | 126.0(12) |
| H(7B)-C(7)-H(7C) | 109.5     | C(11)-C(15)-Zr(2)   | 75.2(6)   |
| C(3)-C(8)-H(8A)  | 109.5     | C(14)-C(15)-Zr(2)   | 73.3(5)   |
| C(3)-C(8)-H(8B)  | 109.5     | C(20)-C(15)-Zr(2)   | 121.7(7)  |
| H(8A)-C(8)-H(8B) | 109.5     | C(11)-C(16)-H(16A)  | 109.5     |
| C(3)-C(8)-H(8C)  | 109.5     | C(11)-C(16)-H(16B)  | 109.5     |
| H(8A)-C(8)-H(8C) | 109.5     | H(16A)-C(16)-H(16B) | 109.5     |
| H(8B)-C(8)-H(8C) | 109.5     | C(11)-C(16)-H(16C)  | 109.5     |
| C(4)-C(9)-H(9A)  | 109.5     | H(16A)-C(16)-H(16C) | 109.5     |
| C(4)-C(9)-H(9B)  | 109.5     | H(16B)-C(16)-H(16C) | 109.5     |



|                     |           |                     |           |
|---------------------|-----------|---------------------|-----------|
| C(12)-C(17)-H(17A)  | 109.5     | C(23)-C(24)-Zr(3)   | 73.2(6)   |
| C(12)-C(17)-H(17B)  | 109.5     | C(29)-C(24)-Zr(3)   | 121.5(8)  |
| H(17A)-C(17)-H(17B) | 109.5     | C(24)-C(25)-C(21)   | 110.0(10) |
| C(12)-C(17)-H(17C)  | 109.5     | C(24)-C(25)-C(30)   | 124.4(11) |
| H(17A)-C(17)-H(17C) | 109.5     | C(21)-C(25)-C(30)   | 125.6(11) |
| H(17B)-C(17)-H(17C) | 109.5     | C(24)-C(25)-Zr(3)   | 74.2(6)   |
| C(13)-C(18)-H(18A)  | 109.5     | C(21)-C(25)-Zr(3)   | 74.3(6)   |
| C(13)-C(18)-H(18B)  | 109.5     | C(30)-C(25)-Zr(3)   | 120.0(7)  |
| H(18A)-C(18)-H(18B) | 109.5     | C(21)-C(26)-H(26A)  | 109.5     |
| C(13)-C(18)-H(18C)  | 109.5     | C(21)-C(26)-H(26B)  | 109.5     |
| H(18A)-C(18)-H(18C) | 109.5     | H(26A)-C(26)-H(26B) | 109.5     |
| H(18B)-C(18)-H(18C) | 109.5     | C(21)-C(26)-H(26C)  | 109.5     |
| C(14)-C(19)-H(19A)  | 109.5     | H(26A)-C(26)-H(26C) | 109.5     |
| C(14)-C(19)-H(19B)  | 109.5     | H(26B)-C(26)-H(26C) | 109.5     |
| H(19A)-C(19)-H(19B) | 109.5     | C(22)-C(27)-H(27A)  | 109.5     |
| C(14)-C(19)-H(19C)  | 109.5     | C(22)-C(27)-H(27B)  | 109.5     |
| H(19A)-C(19)-H(19C) | 109.5     | H(27A)-C(27)-H(27B) | 109.5     |
| H(19B)-C(19)-H(19C) | 109.5     | C(22)-C(27)-H(27C)  | 109.5     |
| C(15)-C(20)-H(20A)  | 109.5     | H(27A)-C(27)-H(27C) | 109.5     |
| C(15)-C(20)-H(20B)  | 109.5     | H(27B)-C(27)-H(27C) | 109.5     |
| H(20A)-C(20)-H(20B) | 109.5     | C(23)-C(28)-H(28A)  | 109.5     |
| C(15)-C(20)-H(20C)  | 109.5     | C(23)-C(28)-H(28B)  | 109.5     |
| H(20A)-C(20)-H(20C) | 109.5     | H(28A)-C(28)-H(28B) | 109.5     |
| H(20B)-C(20)-H(20C) | 109.5     | C(23)-C(28)-H(28C)  | 109.5     |
| C(25)-C(21)-C(22)   | 106.0(10) | H(28A)-C(28)-H(28C) | 109.5     |
| C(25)-C(21)-C(26)   | 128.4(12) | H(28B)-C(28)-H(28C) | 109.5     |
| C(22)-C(21)-C(26)   | 125.4(12) | C(24)-C(29)-H(29A)  | 109.5     |
| C(25)-C(21)-Zr(3)   | 73.1(6)   | C(24)-C(29)-H(29B)  | 109.5     |
| C(22)-C(21)-Zr(3)   | 73.0(6)   | H(29A)-C(29)-H(29B) | 109.5     |
| C(26)-C(21)-Zr(3)   | 123.1(7)  | C(24)-C(29)-H(29C)  | 109.5     |
| C(23)-C(22)-C(21)   | 108.2(10) | H(29A)-C(29)-H(29C) | 109.5     |
| C(23)-C(22)-C(27)   | 125.7(13) | H(29B)-C(29)-H(29C) | 109.5     |
| C(21)-C(22)-C(27)   | 125.9(14) | C(25)-C(30)-H(30A)  | 109.5     |
| C(23)-C(22)-Zr(3)   | 73.5(6)   | C(25)-C(30)-H(30B)  | 109.5     |
| C(21)-C(22)-Zr(3)   | 74.0(6)   | H(30A)-C(30)-H(30B) | 109.5     |
| C(27)-C(22)-Zr(3)   | 121.9(8)  | C(25)-C(30)-H(30C)  | 109.5     |
| C(22)-C(23)-C(24)   | 108.5(10) | H(30A)-C(30)-H(30C) | 109.5     |
| C(22)-C(23)-C(28)   | 127.4(13) | H(30B)-C(30)-H(30C) | 109.5     |
| C(24)-C(23)-C(28)   | 124.1(12) | C(35)-C(31)-C(32)   | 106.8(9)  |
| C(22)-C(23)-Zr(3)   | 74.0(6)   | C(35)-C(31)-C(36)   | 127.6(10) |
| C(24)-C(23)-Zr(3)   | 74.1(6)   | C(32)-C(31)-C(36)   | 125.2(10) |
| C(28)-C(23)-Zr(3)   | 119.6(8)  | C(35)-C(31)-Zr(4)   | 73.4(6)   |
| C(25)-C(24)-C(23)   | 107.3(10) | C(32)-C(31)-Zr(4)   | 74.7(6)   |
| C(25)-C(24)-C(29)   | 126.1(11) | C(36)-C(31)-Zr(4)   | 122.9(7)  |
| C(23)-C(24)-C(29)   | 126.5(11) | C(33)-C(32)-C(31)   | 108.3(10) |
| C(25)-C(24)-Zr(3)   | 73.6(6)   | C(33)-C(32)-C(37)   | 127.1(11) |

|                     |           |                     |       |
|---------------------|-----------|---------------------|-------|
| C(31)-C(32)-C(37)   | 124.5(11) | H(36A)-C(36)-H(36C) | 109.5 |
| C(33)-C(32)-Zr(4)   | 73.5(6)   | H(36B)-C(36)-H(36C) | 109.5 |
| C(31)-C(32)-Zr(4)   | 72.2(6)   | C(32)-C(37)-H(37A)  | 109.5 |
| C(37)-C(32)-Zr(4)   | 122.2(8)  | C(32)-C(37)-H(37B)  | 109.5 |
| C(32)-C(33)-C(34)   | 109.3(9)  | H(37A)-C(37)-H(37B) | 109.5 |
| C(32)-C(33)-C(38)   | 126.8(12) | C(32)-C(37)-H(37C)  | 109.5 |
| C(34)-C(33)-C(38)   | 123.9(11) | H(37A)-C(37)-H(37C) | 109.5 |
| C(32)-C(33)-Zr(4)   | 74.4(6)   | H(37B)-C(37)-H(37C) | 109.5 |
| C(34)-C(33)-Zr(4)   | 74.4(6)   | C(33)-C(38)-H(38A)  | 109.5 |
| C(38)-C(33)-Zr(4)   | 119.9(8)  | C(33)-C(38)-H(38B)  | 109.5 |
| C(35)-C(34)-C(33)   | 106.4(9)  | H(38A)-C(38)-H(38B) | 109.5 |
| C(35)-C(34)-C(39)   | 126.6(11) | C(33)-C(38)-H(38C)  | 109.5 |
| C(33)-C(34)-C(39)   | 126.9(11) | H(38A)-C(38)-H(38C) | 109.5 |
| C(35)-C(34)-Zr(4)   | 72.0(5)   | H(38B)-C(38)-H(38C) | 109.5 |
| C(33)-C(34)-Zr(4)   | 72.7(6)   | C(34)-C(39)-H(39A)  | 109.5 |
| C(39)-C(34)-Zr(4)   | 122.8(8)  | C(34)-C(39)-H(39B)  | 109.5 |
| C(34)-C(35)-C(31)   | 109.1(9)  | H(39A)-C(39)-H(39B) | 109.5 |
| C(34)-C(35)-C(40)   | 125.4(11) | C(34)-C(39)-H(39C)  | 109.5 |
| C(31)-C(35)-C(40)   | 125.4(10) | H(39A)-C(39)-H(39C) | 109.5 |
| C(34)-C(35)-Zr(4)   | 75.3(6)   | H(39B)-C(39)-H(39C) | 109.5 |
| C(31)-C(35)-Zr(4)   | 73.3(6)   | C(35)-C(40)-H(40A)  | 109.5 |
| C(40)-C(35)-Zr(4)   | 120.2(7)  | C(35)-C(40)-H(40B)  | 109.5 |
| C(31)-C(36)-H(36A)  | 109.5     | H(40A)-C(40)-H(40B) | 109.5 |
| C(31)-C(36)-H(36B)  | 109.5     | C(35)-C(40)-H(40C)  | 109.5 |
| H(36A)-C(36)-H(36B) | 109.5     | H(40A)-C(40)-H(40C) | 109.5 |
| C(31)-C(36)-H(36C)  | 109.5     | H(40B)-C(40)-H(40C) | 109.5 |

---

Symmetry transformations used to generate equivalent atoms:

Table S7. Anisotropic displacement parameters ( $\text{\AA}^2 \times 10^3$ ) for  $[(\mu_2\text{-H})_6(\text{Cp}^*\text{Zr})_4]$

|       | U11     | U22     | U33     | U23      | U13      | U12      |
|-------|---------|---------|---------|----------|----------|----------|
| Zr(1) | 28(1)   | 18(1)   | 25(1)   | 0(1)     | -3(1)    | -10(1)   |
| Zr(2) | 23(1)   | 19(1)   | 30(1)   | 0(1)     | -5(1)    | -11(1)   |
| Zr(3) | 26(1)   | 27(1)   | 24(1)   | 2(1)     | -4(1)    | -13(1)   |
| Zr(4) | 23(1)   | 25(1)   | 29(1)   | 3(1)     | -6(1)    | -12(1)   |
| C(1)  | 51(7)   | 21(6)   | 48(7)   | -7(5)    | 1(6)     | 7(5)     |
| C(2)  | 30(6)   | 59(8)   | 60(8)   | -27(7)   | 10(6)    | -18(6)   |
| C(3)  | 99(11)  | 48(8)   | 51(8)   | -32(6)   | 52(8)    | -56(8)   |
| C(4)  | 82(10)  | 41(7)   | 21(6)   | -4(5)    | -19(6)   | -5(7)    |
| C(5)  | 41(7)   | 42(7)   | 62(8)   | -22(6)   | 0(6)     | -22(6)   |
| C(6)  | 210(20) | 16(6)   | 62(10)  | -5(6)    | 11(11)   | -3(9)    |
| C(7)  | 53(10)  | 250(30) | 170(20) | -170(20) | 15(12)   | -12(13)  |
| C(8)  | 200(20) | 105(14) | 137(16) | -84(12)  | 128(16)  | -114(15) |
| C(9)  | 220(20) | 86(13)  | 38(9)   | -16(8)   | -50(12)  | 31(14)   |
| C(10) | 61(10)  | 122(15) | 220(20) | -138(15) | 56(12)   | -60(10)  |
| C(11) | 28(6)   | 20(5)   | 77(9)   | 5(5)     | -22(6)   | -11(5)   |
| C(12) | 80(9)   | 31(6)   | 42(7)   | 12(5)    | -13(7)   | -33(7)   |
| C(13) | 45(7)   | 35(6)   | 66(8)   | -17(6)   | 26(6)    | -28(6)   |
| C(14) | 44(7)   | 31(6)   | 77(9)   | 13(6)    | -28(6)   | -32(5)   |
| C(15) | 58(7)   | 24(5)   | 42(6)   | -16(5)   | 12(6)    | -25(5)   |
| C(16) | 70(10)  | 38(8)   | 191(19) | 34(10)   | -61(12)  | -20(7)   |
| C(17) | 230(20) | 91(12)  | 53(9)   | 36(8)    | -65(11)  | -113(14) |
| C(18) | 86(11)  | 54(9)   | 170(17) | -56(10)  | 78(11)   | -47(9)   |
| C(19) | 115(13) | 71(10)  | 158(16) | 57(10)   | -119(12) | -70(10)  |
| C(20) | 144(15) | 71(10)  | 59(9)   | -30(8)   | 33(9)    | -68(11)  |
| C(21) | 44(7)   | 58(8)   | 31(6)   | 15(5)    | -13(5)   | -14(6)   |
| C(22) | 71(9)   | 64(8)   | 36(7)   | 19(6)    | -34(6)   | -47(7)   |
| C(23) | 59(8)   | 44(7)   | 20(5)   | -8(5)    | -3(5)    | -11(6)   |
| C(24) | 66(8)   | 64(8)   | 16(5)   | 7(5)     | -5(5)    | -40(7)   |
| C(25) | 58(7)   | 33(6)   | 32(6)   | 13(5)    | -11(5)   | -27(6)   |
| C(26) | 63(10)  | 88(11)  | 60(9)   | 21(8)    | -3(8)    | 8(8)     |
| C(27) | 135(15) | 158(17) | 103(13) | 64(12)   | -77(12)  | -125(15) |
| C(28) | 184(19) | 62(10)  | 51(9)   | -15(7)   | -37(10)  | -41(11)  |
| C(29) | 92(11)  | 85(11)  | 44(8)   | 13(7)    | -4(8)    | -41(9)   |
| C(30) | 112(12) | 44(8)   | 71(10)  | 13(7)    | -31(9)   | -37(8)   |
| C(31) | 25(5)   | 44(6)   | 41(6)   | -12(5)   | -1(5)    | -14(5)   |
| C(32) | 34(6)   | 47(7)   | 50(7)   | 2(5)     | 3(5)     | -26(5)   |
| C(33) | 40(7)   | 37(6)   | 69(8)   | -4(6)    | 9(6)     | -30(6)   |
| C(34) | 34(6)   | 58(8)   | 50(7)   | -10(6)   | -10(5)   | -30(6)   |
| C(35) | 27(6)   | 42(6)   | 47(7)   | 11(5)    | -21(5)   | -14(5)   |
| C(36) | 33(6)   | 37(7)   | 87(10)  | -21(6)   | -4(6)    | -10(5)   |
| C(37) | 67(9)   | 119(13) | 43(8)   | -15(8)   | 28(7)    | -51(9)   |
| C(38) | 67(10)  | 56(9)   | 123(14) | 11(9)    | 4(9)     | -36(8)   |

|       |       |         |        |        |        |        |
|-------|-------|---------|--------|--------|--------|--------|
| C(39) | 49(8) | 109(12) | 69(10) | -20(9) | -17(7) | -28(8) |
| C(40) | 47(7) | 76(9)   | 48(7)  | 23(6)  | -31(6) | -20(7) |

---

The anisotropic displacement factor exponent takes the form:  $-2p^2 [ h^2 a^2 U^{11} + \dots + 2 h k a^* b^* U^{12} ]$

Table S8. Hydrogen coordinates ( $\times 10^4$ ) and isotropic displacement parameters ( $\text{\AA}^2 \times 10^3$ ) for  $[(\mu_2\text{-H})_6(\text{Cp}^*\text{Zr})_4]$ .

|        | x     | y     | z    | U(eq) |
|--------|-------|-------|------|-------|
| H(6A)  | 8356  | 3308  | 2077 | 170   |
| H(6B)  | 9573  | 3473  | 2318 | 170   |
| H(6C)  | 9771  | 2626  | 1657 | 170   |
| H(7A)  | 10996 | 4460  | 1983 | 240   |
| H(7B)  | 11080 | 5727  | 1553 | 240   |
| H(7C)  | 11684 | 4387  | 1177 | 240   |
| H(8A)  | 10120 | 6821  | -196 | 209   |
| H(8B)  | 10425 | 7107  | 555  | 209   |
| H(8C)  | 9069  | 8004  | 237  | 209   |
| H(9A)  | 7555  | 7355  | -384 | 214   |
| H(9B)  | 6380  | 7782  | 242  | 214   |
| H(9C)  | 6660  | 6564  | -199 | 214   |
| H(10A) | 6578  | 4360  | 1445 | 184   |
| H(10B) | 7178  | 3900  | 654  | 184   |
| H(10C) | 6074  | 5327  | 753  | 184   |
| H(16A) | 4501  | 13597 | 1732 | 148   |
| H(16B) | 4096  | 12708 | 2355 | 148   |
| H(16C) | 4325  | 12359 | 1534 | 148   |
| H(17A) | 7315  | 10575 | 423  | 158   |
| H(17B) | 6819  | 12113 | 400  | 158   |
| H(17C) | 5813  | 11456 | 643  | 158   |
| H(18A) | 9401  | 9688  | 845  | 153   |
| H(18B) | 10103 | 9329  | 1572 | 153   |
| H(18C) | 9890  | 10670 | 1117 | 153   |
| H(19A) | 9511  | 11131 | 2848 | 149   |
| H(19B) | 9784  | 9645  | 2811 | 149   |
| H(19C) | 8772  | 10466 | 3433 | 149   |
| H(20A) | 5954  | 13080 | 3314 | 128   |
| H(20B) | 6556  | 11660 | 3708 | 128   |
| H(20C) | 5157  | 12190 | 3410 | 128   |
| H(26A) | 10952 | 4088  | 4159 | 130   |
| H(26B) | 10857 | 5208  | 3537 | 130   |
| H(26C) | 10323 | 4150  | 3436 | 130   |
| H(27A) | 9147  | 8328  | 4486 | 165   |
| H(27B) | 10094 | 7431  | 3872 | 165   |
| H(27C) | 10308 | 6984  | 4703 | 165   |
| H(28A) | 6726  | 8258  | 5617 | 147   |
| H(28B) | 5802  | 8811  | 4976 | 147   |
| H(28C) | 7097  | 9061  | 4931 | 147   |
| H(29A) | 5344  | 5903  | 4675 | 110   |
| H(29B) | 5071  | 7162  | 5077 | 110   |

|        |      |       |      |     |
|--------|------|-------|------|-----|
| H(29C) | 5785 | 5753  | 5465 | 110 |
| H(30A) | 7864 | 3489  | 4625 | 110 |
| H(30B) | 8652 | 3494  | 3850 | 110 |
| H(30C) | 7096 | 4216  | 3937 | 110 |
| H(36A) | 1215 | 11477 | 3146 | 79  |
| H(36B) | 2378 | 11661 | 2628 | 79  |
| H(36C) | 2608 | 11047 | 3436 | 79  |
| H(37A) | 2770 | 7715  | 4228 | 112 |
| H(37B) | 1516 | 9057  | 4172 | 112 |
| H(37C) | 2916 | 9052  | 4217 | 112 |
| H(38A) | 3448 | 6068  | 3533 | 122 |
| H(38B) | 3917 | 5660  | 2723 | 122 |
| H(38C) | 2409 | 6140  | 3015 | 122 |
| H(39A) | 3655 | 6446  | 1532 | 112 |
| H(39B) | 3760 | 7626  | 1012 | 112 |
| H(39C) | 2371 | 7569  | 1237 | 112 |
| H(40A) | 3473 | 9976  | 1049 | 88  |
| H(40B) | 2600 | 11178 | 1518 | 88  |
| H(40C) | 1922 | 10466 | 1145 | 88  |

---

Table S9. Wiberg bond indices (bond order) obtained by B3LYP with basis LanL2DZ for Zr, and cc-pVDZ for Cl, C, and H.

|             | bond length(Å) | bond order |
|-------------|----------------|------------|
| <b>1</b>    |                |            |
| Zr(1)-Zr(2) | 3.55118        | 0.246      |
| Zr(1)-Zr(3) | 3.05411        | 0.647      |
| Zr(1)-Zr(4) | 3.05384        | 0.685      |
| Zr(2)-Zr(3) | 3.05812        | 0.654      |
| Zr(2)-Zr(4) | 3.05120        | 0.649      |
| Zr(3)-Zr(4) | 3.56439        | 0.263      |
| <b>2</b>    |                |            |
| Zr(1)-Zr(2) | 3.06030        | 0.781      |
| Zr(1)-Zr(3) | 3.05254        | 0.980      |
| Zr(1)-Zr(4) | 3.06946        | 0.784      |
| Zr(2)-Zr(3) | 3.07379        | 0.745      |
| Zr(2)-Zr(4) | 3.07741        | 0.925      |
| Zr(3)-Zr(4) | 3.08625        | 0.724      |

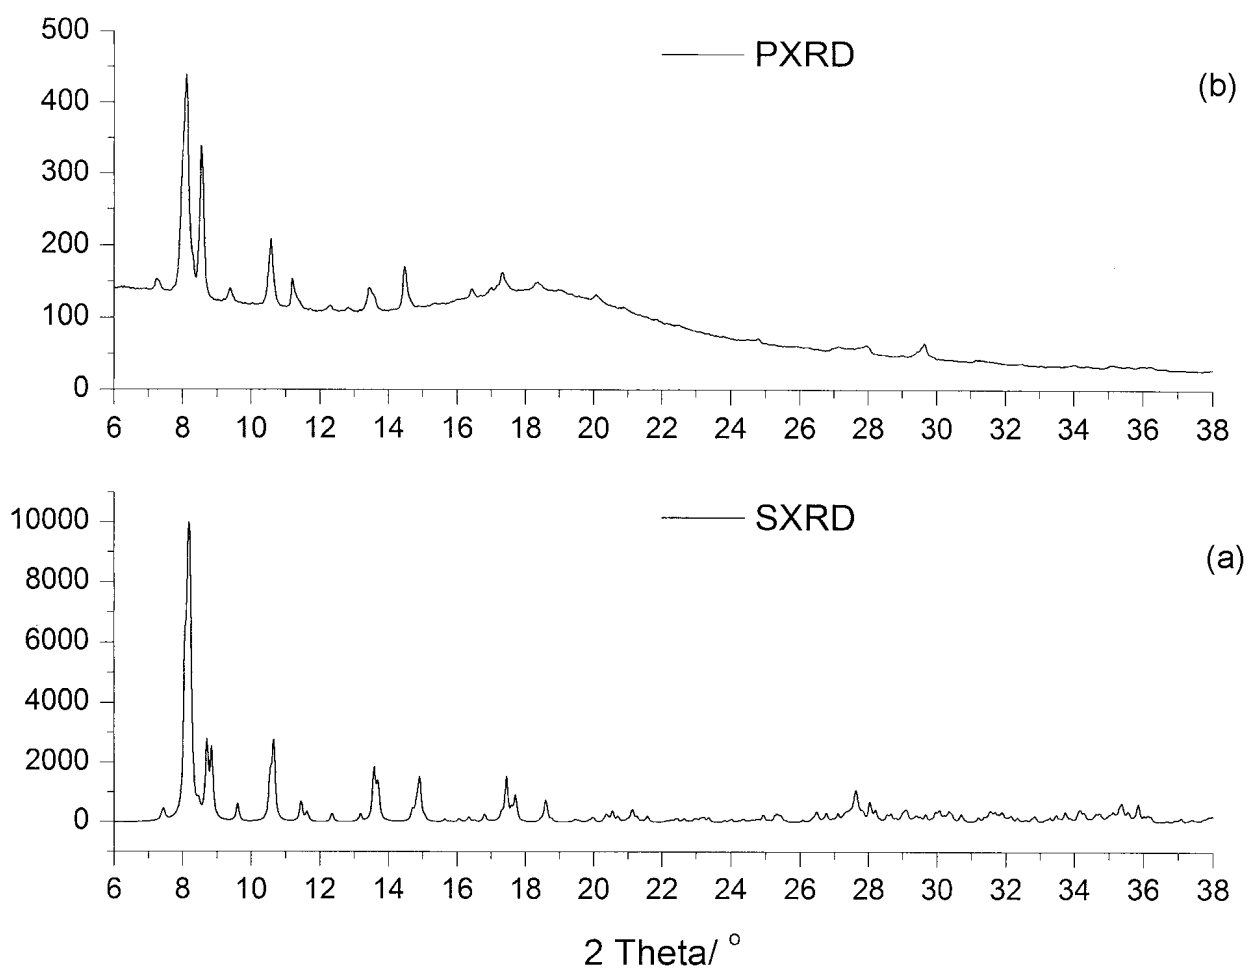

Figure S1
